# Bayesian Phylogenetic Inference of HIV Latent Lineage Ages Using Serial Sequences

Anna Nagel<sup>a,1</sup> and Bruce Rannala<sup>a</sup>

<sup>a</sup>Department of Evolution and Ecology, University of California, Davis, CA 95616

This manuscript was compiled on June 8, 2022

1 **HIV evolves rapidly within individuals, allowing phylogenetic stud-**  
2 **ies to infer the history of viral lineages on short time scales. Lat-**  
3 **ent HIV sequences are an exception to this rapid evolution, as their**  
4 **transcriptional inactivity leads to negligible mutation rates in com-**  
5 **parison to non-latent HIV lineages. Latent sequences are of keen**  
6 **interest as they provide insight into the formation, persistence, and**  
7 **decay of the latent reservoir. Different mutation rates in latent versus**  
8 **active HIV lineages generate potential information about the times at**  
9 **which sequences entered the latent reservoir. A Bayesian phyloge-**  
10 **netic method is developed to infer integration times of latent HIV se-**  
11 **quences. The method uses informative priors to incorporate biolog-**  
12 **ically sensible bounds on inferences (such as requiring sequences**  
13 **to become latent before being sampled) that many existing methods**  
14 **lack. A new simulation method is also developed, based on widely-**  
15 **used epidemiological models of within-host viral dynamics, and ap-**  
16 **plied to evaluate the new method, showing that point estimates and**  
17 **credible intervals are often more accurate by comparison with ex-**  
18 **isting methods. Accurate estimates of latent integration dates are**  
19 **crucial in dating the formation of the latent reservoir relative to key**  
20 **events during HIV infection, such as the initiation of antiretroviral**  
21 **treatment. The method is applied to analyze publicly-available se-**  
22 **quence data from 4 HIV patients, providing new insights regarding**  
23 **the temporal pattern of latent HIV integration events.**

HIV | latency | Bayesian phylogenetic inference

1 **A** major obstacle to the development of a cure for HIV  
2 has been the presence of latently infected cells. HIV  
3 is a retrovirus that integrates its genome into the host cell  
4 genome. During latent infection, the integrated provirus is in a  
5 reversible state of transcriptional inactivity. Latently infected  
6 cells are not targeted by current treatment methods, namely  
7 antiretroviral therapy (ART). Consequently, treatment must  
8 be continued for life or the reactivation of latent cells will lead  
9 to a rapid rebound in viral load and disease progression (1).  
10 A detailed understanding of the dynamic processes of seeding,  
11 reseeded, and decay of the latent reservoir through the infer-  
12 ence of latent integration dates for individual proviruses will  
13 allow researchers to have a better understanding of the nature  
14 of the reservoir as they work toward a cure for HIV.

15 HIV infects immune cells, specifically CD4+ cells, such as  
16 helper T cells and macrophages. Most infected cells die quickly  
17 (2, 3). In contrast, memory T cells have a long half-life of 4.4  
18 years and can thus establish a latent reservoir for HIV (4).  
19 Memory T cells may be infected directly or an activated T cell  
20 may revert back to a quiescent state (5). Latently infected  
21 memory T cells can be activated by antigens, leading to the  
22 activation of the HIV provirus (6). Effective ART prevents  
23 infections of new host cells but does not prevent infected cells  
24 from producing virions. HIV can persist hidden in memory  
25 cells for decades, even with effective ART (4).

26 The latent reservoir is initially formed within days of infec-  
27 tion and continues to be reseeded over time (7–9). However,  
28 the extent to which the composition of the reservoir changes  
29 over time is unclear. Some studies concluded that the latent  
30 reservoir that exists during ART is mostly seeded shortly before  
31 treatment initiation (10–12), while others have concluded that  
32 the reservoir is continuously seeded until treatment initiation  
33 (13). However, some of these results are difficult to interpret as  
34 a variety of mechanisms could account for these patterns. The  
35 timing of the formation of the latent reservoir is ultimately an  
36 empirical question that can be studied in multiple ways. In  
37 addition to further experimental work, reconstructing the ages  
38 of latent lineages can in principle be done by analyzing the  
39 patterns of variation observed among sampled sequences and  
40 applying phylogenetic methods designed to estimate sequence  
41 divergence times with serial sequence samples (11–16). The  
42 focus of this paper will be the development of new statistical  
43 and computational methods to accurately date the integration  
44 times of sampled latent sequences.

45 A variety of heuristic methods have been developed to esti-  
46 mate integration times using a combination of RNA sequences  
47 from serial sampled actively replicating sequences and RNA  
48 or DNA from putative latent sequences. All methods rely on a  
49 fixed estimate of the gene tree topology for the HIV sequences  
50 and some require branch lengths. Jones et al. developed a dis-  
51 tance method that used linear regression (LR) to estimate the  
52 mutation rate from root-to-tip distances and sampling dates  
53 for non-latent sequences. This mutation rate is then used

## Significance Statement

Phylogenetic studies are increasingly being used to characterize within-host HIV evolution and the temporal dynamics of the HIV latent reservoir in particular, which is not targeted by current treatment methods and thus prevents a cure for HIV. Phylogenetic methods currently used to analyze HIV sequences suffer from conceptual and statistical problems that degrade their performance. A new Bayesian inference method to estimate the ages of latent sequences and a new simulation method based on within-host viral dynamics are developed. The new inference method outperforms existing methods, particularly in characterizing uncertainty. Understanding how the latent HIV reservoir changes overtime will allow researchers to better understand the nature of HIV infection and develop strategies for a cure.

A.N. and B.R. conceived the study. A.N. and B.R. developed the theory and the algorithms. A.N. wrote the programs and ran the analyses. A.N. and B.R. wrote the paper.

The authors declare no conflict of interest.

<sup>1</sup>To whom correspondence should be addressed. E-mail: [aanagel@ucdavis.edu](mailto:aanagel@ucdavis.edu)

54 to estimate the latent integration dates (13). This method  
55 relies on a molecular clock, and is not used if the clock is  
56 rejected. Jones and Poon developed a related method, esti-  
57 mating mutation rate in the same way but estimated internal  
58 node ages and unknown tip ages using a maximum likelihood  
59 (ML) approach using a specified mutation rate (15, 16). To  
60 et al. developed a distance method using a least squares (LS)  
61 approach to estimate mutation rates and date internal nodes  
62 and tips with unknown ages (17). Their method requires the  
63 sequence length for estimating confidence intervals, but not  
64 the alignment. It was designed for extremely large phylogenies,  
65 but is applicable to HIV latency datasets as well. Abrahams  
66 et al. used multiple heuristic methods to date latent sequences.  
67 In one method, the distance from the closest sequence to the  
68 latent sequence,  $d$ , is determined, and the age of the latent  
69 sequence is assigned based on the sample time of the majority  
70 of sequences within  $2d$  of the latent sequence (11). A similar  
71 method traverses the tree from the latent sequence toward  
72 the root of the tree until a node with 90% bootstrap support  
73 is found with at least one pre-treatment sequence. Then a  
74 latency time is assigned based on the most common sampling  
75 time of the pre-treatment sequences descendant from the well  
76 supported node (11). The two methods used by Abrahams et  
77 al. may be very sensitive to the number of sequences sampled  
78 and the sampling times. Simulation studies suggest that LS  
79 may out-perform all of these methods (15, 17). An alternative  
80 to these existing methods could be developed based on estab-  
81 lished parametric phylogenetic models that use tip dating for  
82 estimating and calibrating phylogenies of viral data, and are  
83 potentially more accurate (18, 19).

84 It has been difficult to evaluate the statistical performance  
85 of current methods for inferring integration times of latent HIV  
86 since existing simulation methods are biologically unrealistic.  
87 During the acute phase of infection, viral load grows exponen-  
88 tially shortly after infection, peaking within several weeks (20).  
89 Then the viral load falls one to two orders of magnitude before  
90 reaching a quasi-steady state. During this chronic phase of  
91 infection, the viral load remains relatively unchanged or rises  
92 only slowly until the onset of AIDS. In contrast, simulation  
93 methods that have been used to evaluate methods for dating  
94 integration events largely ignore the underlying population  
95 dynamics of HIV. Some assume a constant rate birth-death  
96 process while other use a compartmental model with logistic  
97 growth (13, 15). Epidemiologists use more complex models,  
98 typically ordinary differential equations (ODEs), to describe  
99 HIV viral dynamics (21–23). These models produce population  
100 trajectories that more closely match empirical observations,  
101 especially during acute infection, but the models have yet to be  
102 used in simulations to generate within-host HIV sequence data.  
103 The time period of acute infection is known to be important  
104 in establishing the latent reservoir (7), and this peak dynamic  
105 should be incorporated into simulation methods used to test  
106 inference methods aimed at estimating latency times.

107 We propose a Bayesian inference method to infer the latent  
108 integration date of HIV sequences. This is a full likelihood  
109 method, conditional on the phylogenetic tree topology. Ad-  
110 ditionally, we develop a simulation method based on existing  
111 viral dynamic models of HIV to test the performance of the  
112 inference method. The simulation model is parameterized  
113 using estimates from empirical datasets that produce realistic  
114 viral population dynamics (See SI section 4) (24).

## 115 Model

116 A new program, HIVtree, was developed by modifying an  
117 existing program, MCMCtree, to infer latent integration dates  
118 (18). MCMCtree is a Bayesian phylogenetic inference program  
119 which estimates a time calibrated tree using viral sequences  
120 with serial samples given a fixed tree topology. It uses Markov  
121 chain Monte Carlo (MCMC) to estimate the model paramete-  
122 rs. HIVtree incorporates additional parameters, the latent  
123 integration times, into the model. The program also estimates  
124 the originally defined parameters in MCMCtree, including sub-  
125 stitution model parameters, substitution rate, and the internal  
126 node ages.

127 HIVtree assumes a priori that some sequences are known to  
128 be latent while others are not. Every sequence must also have  
129 a known sample date. In addition, every latent sequence has  
130 an unknown latent integration date. The youngest possible  
131 latent integration date is the sample time, and internal nodes  
132 cannot be latent. There is an optional bound on the oldest  
133 possible latent integration time, which could correspond to the  
134 oldest possible infection time. The model assumes that latent  
135 lineages have a mutation rate of zero, and all other lineages  
136 follow strict molecular clock. For calculating the likelihood,  
137 the latency time is treated as if it were the sample date for a  
138 non-latent lineage. This acts to reduce the tip age to be the  
139 time the sequence became latent (Fig. S4).

140 **Markov Chain Monte Carlo (MCMC).** HIVtree adds an addi-  
141 tional step to the MCMC to estimate the latent times. In  
142 MCMCtree, proposals to non-root internal node ages are  
143 bounded above by the age of the parent node and below  
144 by the age of the oldest daughter node. A new time for each  
145 internal node is proposed within these bounds, the acceptance  
146 ratio is calculated, and the move is either accepted or rejected  
147 (18). In HIVtree, in addition to bounds on nodes, latent times  
148 are bounded above by the age of the parent node and below  
149 by the sample time. This ensures that the sequence becomes  
150 latent before it is sampled and that internal nodes cannot be  
151 latent. If the optional bound on latent integration times is  
152 used, the younger of the parent node age and the bound is  
153 used as the bound. Similar to MCMCtree, for each latent time,  
154 a move is proposed within these bounds, the acceptance ratio  
155 is calculated, and the move is either accepted or rejected (Fig.  
156 S4). Other than the difference in bounds, the proposal moves  
157 for the internal nodes and the latency times are identical. For  
158 the mixing step, the latency time is treated as equivalent to  
159 the sample date. The mixing step was not modified from  
160 MCMCtree (18).

161 **Prior Model.** Two new root age priors were implemented in  
162 HIVtree. HIVtree and MCMCtree both require the user to  
163 specify the priors in backward time. The time of the last  
164 sample is considered to be time zero, and earlier times are  
165 positive. The programs also require a specification of a time  
166 unit transformation. For example, consider HIV data with the  
167 sample times specified in days. A time unit of 1000 days means  
168 that 0.365 is equivalent to a year in the prior specification. A  
169 shifted gamma prior,  $\Gamma(\alpha, \beta)$ , is implemented as the root age  
170 prior. The distribution is shifted by adding the first sample  
171 time to the distribution. This ensures there is no density after  
172 sequences are sampled. The gamma distribution parameters  
173 must also be chosen with the time unit transformation going

174 backward in time. An option for a more informative prior is a  
 175 uniform prior with narrow hard bounds (zero tail probability),  
 176  $U(a, b)$ . There is no explicit prior on the internal nodes ages  
 177 which is equivalent to a uniform prior on the possible node  
 178 ages given the constraints from the sampling dates and the  
 179 root age. Since the sampling prior is not explicit and the  
 180 rank order of the nodes and the constraints jointly determine  
 181 the prior, the MCMC must be run without data in order to  
 182 recover the prior for the internal nodes, latency times, and root  
 183 age. The distribution of the root age when the MCMC is run  
 184 without data will not be equivalent to the user specified prior  
 185 (Fig. S5). This effect is similar to constraints imposed by fossil  
 186 calibrations (25). The mean root age will be older than the  
 187 expectation of the prior distribution. The parameters of the  
 188 gamma distribution can be modified to achieve a desired mean  
 189 and variance for the root age. Using a uniform prior with  
 190 a wide interval is discouraged due to this effect (an induced  
 191 prior age of the root that is very old).

192 **Combining Inferences Across Genes.** HIVtree only allows single  
 193 locus inferences. However, the entire HIV genome is incor-  
 194 porated in the host cell genome at the same time, meaning  
 195 different genes share the same latent integration times. Let  
 196  $X = \{x_i\}$  be sequence data for  $n$  loci, where  $x_i$  are sequence  
 197 data at locus  $i$ . Let  $T$  be a latency time that is shared across  
 198 loci. The remaining parameters of the gene tree may be differ-  
 199 ent due to recombination. The posterior density of  $T$  is

$$f(T|X) = \frac{P(X|T)f(T)}{\int P(X|T)f(T)dT}.$$

201 If we ignore the correlation between gene trees due to limited  
 202 recombination and treat the loci as independent the posterior  
 203 density can be written as

$$f(T|X) = \frac{\prod_{i=1}^n P(x_i|T)f(T)}{C_A},$$

205 where  $C_A$  is the marginal probability of the data (which is a  
 206 constant),

$$C_A = \int \prod_{i=1}^n P(x_i|T)f(T)dT.$$

208 We want to calculate the posterior probability of  $T$  for each  
 209 locus separately using MCMC and subsequently combine them  
 210 to obtain a posterior density for all the loci. To do this we  
 211 formulate the above equation as a product of the marginal  
 212 posterior of  $T$  for each locus,

$$f(T|X) = \prod_{i=1}^n \left[ \frac{f(T|x_i)}{f_i(T)} \right] \times f(T) \times \frac{\prod_{i=1}^n C_i}{C_A}, \quad [1]$$

214 where  $f_i(T)$  is the prior on  $T$  for the  $i$ th locus and  $f(T)$  is  
 215 the desired prior for the combined posterior. The last term is  
 216 a proportionality constant that insures the posterior density  
 217 integrates to 1. A simple example illustrating this general  
 218 approach to combine posteriors using a normal distribution is  
 219 provided in SI section 8.

220 In our analyses,  $n$  independent MCMC analyses are run  
 221 (with and without using the likelihood) and kernel density es-  
 222 timation is used to estimate  $P(T|X_i)$  and  $f_i(T)$ , respectively,  
 223 for  $i = 1, \dots, n$ . The estimated kernel functions are then  
 224 used to evaluate equation 1 up to an unspecified proportion-  
 225 ality constant (see supplemental material). Simulations were

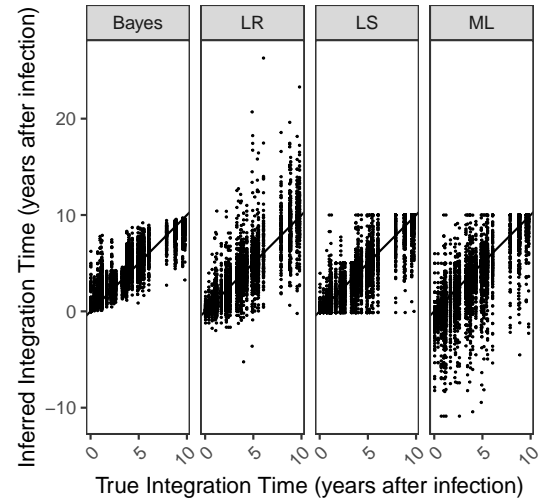

Fig. 1. For all 30 alignments simulated for *C1V2* on a fixed tree, the inferred integration dates are shown for each method. If the methods performed perfectly, all points would fall on the line, which has an intercept of 0 and slope of 1. The units are years after infection.

used to evaluate the performance of this approach to combine posteriors.

## Results

**Simulation Analysis.** Here we compare the statistical performance of HIVtree and several other existing methods when analyzing simulated datasets with known latency times.

**Comparisons on a Fixed Tree Topology.** HIVtree was compared with three existing methods, least squares dating (LS) (17), linear regression (LR) (13), and pseudo maximum likelihood (ML) (16) using simulated datasets. The effect of variation among the independently simulated sequences on point estimates of latent tip ages can be seen by comparing the estimates for a given latent tip in a fixed tree. Even with *C1V2*, the most informative gene simulated, there is considerable variation in the estimated latency time for a given latent tip (Fig. 1). The variation is even larger for the other genes (Fig. S6). The estimated times for a single latent tip sometimes differs from the true value by a decade or more for both the LR and ML methods. The LS method has fewer extreme estimates, which are prevented by bounds on the integration times. LS allows for upper and lower bounds for each individual latent sequence while ML has the same upper bound on all latent sequences, which is the last sample time. The LR has no bounds on the inferred integration time, potentially allowing the latent sequences to be formed either after the sequence was sampled or before an individual was infected. Both outcomes are logically impossible.

**Inferences Across Genes.** The posterior distribution for each latent time is inferred separately for each gene when using HIVtree. When the marginal densities are combined across the genes, the posterior densities become narrower and closer to the true value (Fig. 2). The other methods do not allow such information sharing.

**Summary of Method Performance.** Mean square error (MSE) is a useful measure of method performance that includes both bias

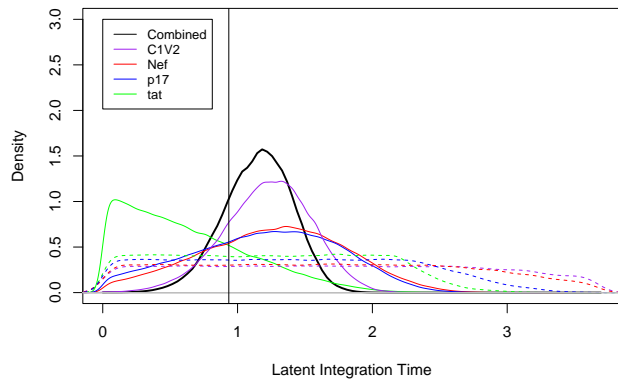

**Fig. 2.** Joint posterior density for a single latency time across all genes. Each solid colored line shows the marginal posterior density for a single latency time for different genes. The dashed colored lines show the marginal prior densities, which result from running the MCMC without data. The solid black line shows the estimate with the genes combined. The vertical line is the true latent integration time. The MCMC was run for 500,000 iterations, sampling every other iteration. This results in smoother curves than the shorter MCMCs run used in the larger analysis of simulated data, but results are very similar.

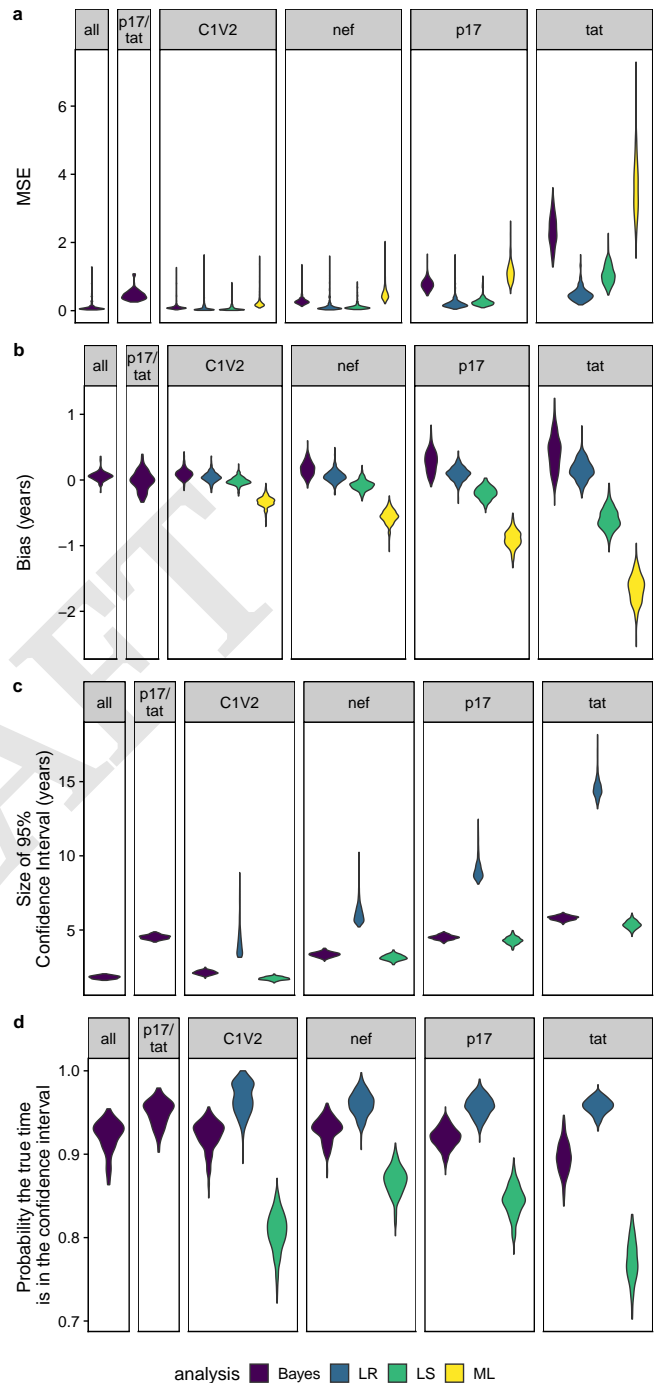

**Fig. 3.** For each of fixed tree topologies, the mean square error (MSE), bias, and size of the 95% confidence/credibility interval was averaged across all 900 latent times for each gene analysis combination. Each violin plot is made using 300 data points, corresponding to the average from each of the 300 fixed tree topologies. For the Bayesian combined analysis of either all of the genes or only p17/tat, only a third of the fixed tree topologies were analyzed.

261 and variance and is directly comparable across methods. MSE  
 262 is lowest for *C1V2* and highest for *tat* for all analyses (Fig.  
 263 3a). All of the methods are the least biased for *C1V2* and  
 264 the most biased for *tat* (Fig. 3b). The average bias for the  
 265 ML and LS methods are more negative for the shorter, slower  
 266 evolving genes, while the Bayesian and LR method have a  
 267 positive bias on average.

268 In the simulation analysis, the probability that the true  
 269 value falls in the 95% confidence interval (or 95% highest  
 270 posterior density for Bayesian analysis) is considered (Fig. 3d).  
 271 The Bayesian method has comparable coverage probabilities  
 272 for *C1V2* and *nef* of 92% and 93%, respectively, with the  
 273 lowest coverage probability for *tat* (90%). The average size of  
 274 the 95% credible set for the longest and shortest sequences,  
 275 *C1V2* and *tat*, is 2.1 years and 5.8 years, respectively. The  
 276 LR has the highest coverage, with a coverage probability of  
 277 97% for *C1V2* and 96% for *tat*. However, LR has very large  
 278 confidence intervals (Fig. 3c). The mean size of the 95%  
 279 confidence interval is 4 years and 15 years for *C1V2* and  
 280 *tat*, respectively. In contrast, the LS method shows lower coverage  
 281 probabilities but smaller confidence intervals. The LS method  
 282 has its highest average coverage probability for *nef* (87%), but  
 283 drops to 77% for *tat* (Fig. 3d). For the longest gene, *C1V2*,  
 284 the average coverage probability is only 81%. This is likely  
 285 due to the much smaller confidence interval size. The size of  
 286 the 95% confidence interval is much larger for the LR method  
 287 than either the LS or Bayesian methods (Fig. 3c). The LS and  
 288 Bayesian methods have similar size confidence intervals, but  
 289 the Bayesian method is more likely to contain the true value  
 290 in the 95% confidence interval (has higher average coverage  
 291 probability). The ML method has the largest MSE and bias  
 292 on average for all regions and does not provide confidence  
 293 intervals.

294 When the inferences are combined across all four genes, the  
 295 average size 95% credible set is 110 days smaller on average.  
 296 The average probability the true integration time is in the

297 95% credible set is very similar to the results for the longest  
 298 gene. When the two shortest genes, *p17* and *tat*, are combined,  
 299 the average size of the 95% credible set is very similar to *p17*  
 300 alone, but the probability the true value is in the 95% credible  
 301 set increases from 92% with *p17* alone to 95% in the combined  
 302 analysis (Fig. 3c,d).

303 **Empirical Analysis.** We applied each of the four methods to  
 304 HIV data sets from two studies of serial sampled HIV se-  
 305 quences. The first data set (Jones et al.) is comprised of *nef*  
 306 sequences for two patients (13). For each patient, plasma HIV  
 307 RNA was sequenced multiple times over a period of almost a  
 308 decade either pre-treatment or during incompletely suppressive  
 309 dual ART. After the initiation of combination ART (cART),  
 310 samples from the putative reservoir were taken from at least  
 311 two time points. Samples consisted of HIV RNA sequences  
 312 sampled during viral blips and proviral DNA collected from  
 313 whole blood and peripheral blood mononuclear cells (PBMC).  
 314 The second data set (Abrahams et al.) has three regions of *env*  
 315 for both the patients analyzed (217 and 257) and *gag* and *nef*  
 316 sequences for one patient (257) (11). For both patients, virus  
 317 was sequenced from the plasma multiple times over several  
 318 years prior to ART initiation. After ART initiation, viral  
 319 RNA was isolated from the supernatant of quantitative viral  
 320 outgrowth assays.

321 The inferred latent integration times for the patients in the  
 322 Jones et al. dataset obtained using HIVtree span over a decade  
 323 (Fig. 4), similar to estimates obtained using other methods  
 324 (Fig. S7). However, ML and LR infer integration times that  
 325 occur after the sampling time in some cases (Fig. S9). For  
 326 the Abrahams et al. dataset, the point estimates, especially  
 327 for the early sample times (11.1 for patient 1 and 17.9 for  
 328 patient 2), tend to be concentrated near the time of ART  
 329 initiation. The combined point estimates for the latency times  
 330 inferred using HIVtree appear loosely clustered around the  
 331 time ART began for patient 257, with narrower credible sets  
 332 than the analyses on individual genes (Fig. 5). These patterns  
 333 for patient 217 are less clear, possible due to fewer genomic  
 334 regions and fewer latent sequences (Fig. S8). Sometimes LS  
 335 gives very large confidence intervals, covering the entire area  
 336 between the bounds for a sequence (Fig. S10, S13), while in  
 337 other cases the confidence intervals are smaller than LR.

## 338 Discussion

339 Here, we have described both a phylogenetic method to in-  
 340 fer latent integration times and a new method to simulate  
 341 sequence data based on within-host viral dynamics. HIVtree  
 342 performs better than existing methods by a variety of met-  
 343 rics. The method has smaller confidence intervals on average  
 344 than alternative methods, while still containing the true value,  
 345 resulting in more precise interval estimates of the integra-  
 346 tion dates. Moreover, the MSE is comparable to the best  
 347 alternative method when the data are informative.

348 HIVtree has several improvements over existing methods.  
 349 It allows for biologically relevant bounds on latent integra-  
 350 tion times, such as requiring the latent times be older than the  
 351 sample times with an option to bound the integration times  
 352 at the time of infection. Among the alternative methods, only  
 353 the LS method allows for such bounds. Bayesian inference  
 354 also provides a sensible way to combine estimates across genes,  
 355 while allowing for potentially different gene tree topologies.

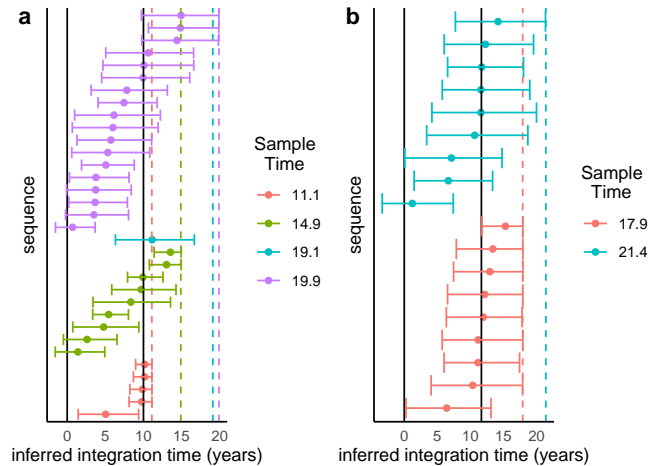

**Fig. 4.** Panels (a) and (b) show the inferred latent integration times, in units of years after diagnosis, for patients 1 and 2, respectively, inferred using HIVtree to analyse sequence data for the *nef* gene locus. A dot indicates the posterior mean and bars represent the 95% credible interval. The solid vertical lines indicate the positive test date (left) and time of cART initiation (right) for each patient. The colored dashed vertical lines indicate the sample times.

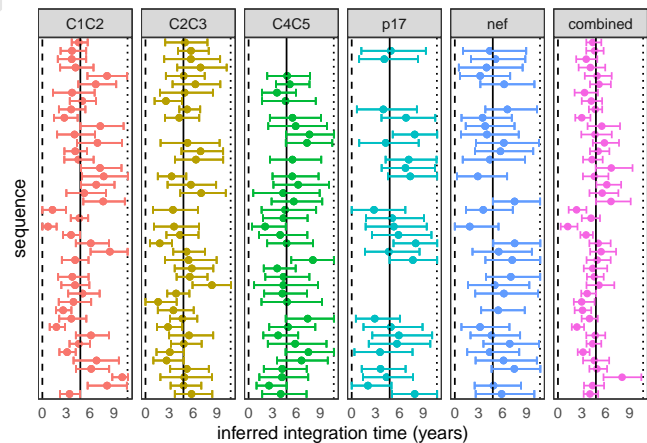

**Fig. 5.** The five panels to the left each show the integration times inferred using HIVtree for a single gene locus. The panel to the right shows the inferred integration times when posterior distributions for the five loci are combined. A dot indicates the posterior mean and bars represent the 95% credible interval, in units of years after diagnosis. The results are from patient 257 (11). 10 non-latent sequence were used as each available timepoint and sites with more than 75% gaps were removed from the alignment prior to analysis, as described in SI section 10. The dashed line shows the infection time, the solid line shows the start of ART, and the dotted line shows the sample time.

This results in more precise estimates, especially when the sequences available are short. There is currently no alternative to the HIVtree method for jointly inferring latency times using multiple loci, nor is there a clear way to do so. Lastly, Bayesian methods have the advantage of well known statistical properties, such as statistical efficiency and consistency. By treating an alignment as data, HIVtree allows for full use of the available sequence data in the inference, whereas the other methods only use an inferred phylogenetic tree which may not be a sufficient statistic.

There are several avenues for improvement of HIVtree. In the current paper, to use data from multiple loci in HIVtree the marginal distributions for the latent integration times were combined. A more formal method to combine data across loci would be to jointly analyze the loci in a single model, allowing the MCMC to integrate over the node ages in each of gene trees separately while constraining the latent integration times to be the same for sequences derived from an individual infected cell. This would be most sensible to implement in a program that accommodates multilocus data, such as *bpp* (26), rather than the parent program of HIVtree, *mcmcree*.

Further, despite desiring a diffuse prior on the node ages and latent times, the prior model in HIVtree seems to be too informative in some cases. The rank order of the nodes and the serial sampling cause average the root age of the phylogeny in the prior to be older than the user input prior. If the root age is constrained, such as by using a uniform prior, the latent times are pushed closer to time present, which introduces a bias to the latent inferences (unpublished preliminary analysis). This means that constraining the root age to be close to the true age can produce worse estimates of the latent times. Similar effects driven by constraints among node ages have been previously noted for fossil calibrations and serially sampled data (18, 27). However, the effects appear to be more pronounced when the root ages are close to the the serially sampled sequences, as can result from within-host viral data. While there may be quite informative outside knowledge on the age of the root for HIV, such as the time of infection, we currently caution against forcing the root age to match the infection time when using HIVtree because this may induce bias in estimates of latent virus integration times.

The difference between the user input prior distribution on the root age and the prior observed when running the MCMC without data appears to be larger with the empirical data than with the simulated datasets. While the exact cause of this discrepancy is unknown, it may be related to the ladder-like tree topologies of the empirical data or the sampling times of the sequences. A different prior may improve some of these limitations. One option would be a serial sample coalescent prior with changing populations sizes (28, 29). This would also be more sensible to implement in a program which includes coalescent models, such as *bpp*. Such a prior could also allow for the incorporation of information on viral population sizes (such as from well described viral dynamic models) and knowledge of the time of infection.

The viral dynamic simulation method developed in this paper is based on well-studied models of HIV population dynamics within hosts. This is likely to be more realistic than traditional methods used to simulate phylogenies, such as constant rate birth-death processes, and it follows standard epidemiology approaches for studying viral dynamics. How-

ever, this model does not incorporate selection, which is known to be important in HIV evolution. The method produces trees that are more star-like, with short internal branches, than those typically inferred in empirical studies of HIV sequences. Future work should focus on modeling selection, as well as other aspects of HIV biology, such as clonal proliferation of latently infected immune cells, to develop simulators and priors for inference that more accurately model HIV biology and produce trees that more closely match the empirical observations.

## Materials and Methods

Here we provide a brief description of the materials and methods used in this paper, which are described fully in the SI Appendix.

**Simulation of Phylogeny.** A stochastic simulation based on existing ODEs was developed to simulate tree topologies of sampled latent and active HIV sequences. In the ODE, the sizes of five populations of cells and viruses are tracked, including uninfected CD4+ target cells, productively (actively) infected CD4+ target cells, virions, replication-competent latent cells, and replication-incompetent latent cells (see SI section 1). The stochastic model is formulated as a continuous-time Markov chain with instantaneous rates as described in the deterministic model (see SI section 2). The process is modeled as a jump chain. A user specified number of virions and latent cells are sampled at any number of user specified times.

A C program was written to to simulate under the stochastic model. In addition to simulating population sizes, it tracks the parent-daughter relationships of all infected cells and viruses in a binary tree (see SI section 3). The amount of time latent in each branch is also tracked. The stochastic and deterministic models are in good agreement when population sizes are large, as expected (Fig. S3). The total number of tips in the tree varied over time. The maximum number of tips in a tree was on the order of  $10^8$  (Fig. S3).

**Simulation of Sequence Data.** A separate C program was written to simulate DNA sequences given a sampled tree with branch lengths and a latent history. Sequences are simulated in the typical manner, assuming independent substitutions among sites, starting at the root of the tree and simulating forward in time toward the tips of the tree. The simulator accommodates models as general as the GTR+ $\Gamma$  substitution model (30, 31). No substitutions can occur while a lineage is latent. The program allows an outgroup with a node age of zero to be simulated. The sequence at the root is specified by a FASTA format input file (from an existing HIV sequence, for example).

**Sampling and simulation parameters.** 100 trees were simulated using the stochastic simulator. 50 viruses and 10 latent cells are sampled every year for 10 years. On the tenth year, an extra 50 latent cells are sampled. For each of these 100 phylogenies, 30 alignments for each of four genomic regions were generated with the DNA simulator using an outgroup. To determine the DNA substitution parameters, within-host longitudinal samples from published data sets for four regions (*tat*, *p17*, *nef*, *C1V2*) were analyzed with MCMCtree (see SI section 6). The estimated substitution rate and length varied among the simulated regions, with *C1V2* having the highest substitution rate ( $\mu = 3.56 \times 10^{-5}$  per base per day) and the most sites ( $n = 825$ ) and *nef* having the next highest substitution rate ( $\mu = 1.34 \times 10^{-5}$  per base per day) and number of sites ( $n = 618$ ). *p17* has a slightly lower substitution rate than *tat* ( $\mu = 8.9 \times 10^{-6}$  per base per day versus  $\mu = 9.9 \times 10^{-6}$  per base per day), but more sites ( $n = 391$  versus  $n = 132$ ) (Table S2). For each phylogeny and alignment, the sequences and phylogenies were then subsampled three times to generate three trees and three corresponding alignments. Specifically, 10 viruses were subsampled every year for 10 years. 10 latent cells were subsampled after 5 years of infection and 20 were subsampled after 10 years of infection. In total, 300 tree topologies were simulated, each with 30 latent and 100 non-latent randomly sampled sequences. This led to a total of

484 300 topologies  $\times$  30 alignments  $\times$  4 regions = 36,000 simulated  
485 datasets.

486 **Maximum Likelihood Tree Inference and Rooting.** To analyze the sim-  
487 ulated datasets a rooted tree topology was first inferred for use  
488 by HIVtree and other heuristic programs. Maximum likelihood  
489 trees were inferred with raxml-ng using an HKY+ $\Gamma$  model and  
490 outgroup rooted (32, 33). 25 parsimony and 25 random starting  
491 trees were used for the tree search. The outgroup was removed  
492 from the inferred tree. Both the LS and Bayesian methods use the  
493 outgroup rooted tree. For the ML method, the tree was re-rooted  
494 using root to tip regression available in the R package ape prior to  
495 analysis (19, 34). The LR method re-roots the tree using root to  
496 tip regression as part of the analysis. For LS, the sampling time  
497 was used as an upper bound for the latent lineages and the lower  
498 bound was 45 days prior to infection, while the active lineages were  
499 constrained to their sampling time. The ML and LR methods do  
500 not include additional constraints.

501 **Bayesian inference.** For HIVtree analyses of simulated data, an  
502 HKY+ $\Gamma$  model was used with 5 rate categories and the prior  $\kappa \sim$   
503  $G(8, 1)$  (32). The prior for among site rate variation was  $\alpha \sim G(4, 8)$ .  
504 A time unit of 1000 was used with a substitution rate prior of  
505  $G(2, 200)$ , meaning the mean was  $10^{-5}$  per base per day. The root  
506 age prior was  $\text{Gamma}(36.5, 100)$ . The latent times were bounded at  
507 3.695, which is equivalent to 45 days prior to infection. Two MCMCs  
508 were run for each analysis to check for convergence. MCMC lengths  
509 and conditions for convergence are described in the SI Appendix  
510 (see SI section 7).

511 **Combining Posterior Estimates from HIVtree.** For combining results  
512 in Bayesian analyses of the simulated and empirical datasets, the  
513 function kdensity in the kdensity R package was used for kernel  
514 density estimation of the posterior distribution and the prior distri-  
515 bution of each latent time (35). The posteriors and priors for  
516 each gene were multiplied according to equation 1. The resulting  
517 function was normalized by finding the proportionality constant  
518 using the integrate function. For the simulated datasets, the inte-  
519 gral bounds were set to the bounds on the latent time in HIVtree,  
520 which was the sample time and 45 days prior to infection. The  
521 0.025 and 0.975 quantiles were found using the invFunc function in  
522 the R package GoFKernel (36). The mean for the joint posterior  
523 was found using the integrate function. For the simulated datasets,  
524 this analysis was conducted on only a third of the trees from the  
525 main simulation analysis due to the highly demanding computations  
526 involved. For a small subset of simulated data, numerical issues  
527 prevented estimation of a combined latent integration time. (see SI  
528 section 8b).

529 **Existing Methods.** The LR method was run using scripts available  
530 at:  
531 <https://github.com/cfe-lab/phyloclating>  
532 The ML method used scripts available at:  
533 <https://github.com/brj1/node.dating/releases/tag/v1.2>  
534 The driver script provided by Jones et al. is available at:  
535 <https://github.com/nage0178/HIVtreeAnalysis>  
536 The LS method was obtained from:  
537 <https://github.com/tothuhien/lsd-0.3beta/releases/tag/v0.3.3>

538 **Empirical Analysis.** Data sets published from (11, 13) required cura-  
539 tion prior to analysis. Due the large number of sequences in the  
540 the Abrahams et al. data set, sequences were subsampled, and  
541 alignments were edited due to gaps (see SI section 10). For all  
542 empirical data sets, raxml-ng was run using an HKY+ $\Gamma$  model (33).  
543 25 parsimony and 25 random starting trees were used for the tree  
544 search. Trees were rooted using root to tip regression using the rtt  
545 function in the ape package available in the R package ape prior to  
546 analysis (19, 34). Each of the four methods were run on all datasets.

547 For the Jones et al. dataset, HIVtree was run with a root age  
548 prior of  $G(8,60)$  for patient 1 and  $G(15,50)$  for patient 2. These  
549 priors were chosen to have an induced prior when running without  
550 data with a variance of several years and a mean several years prior  
551 to diagnosis. Latent integration times were bounded 10 years prior  
552 to diagnosis, as a very conservative oldest possible bound. In the  
553 HIVtree analysis, an HKY+ $\Gamma$  model was used with 5 rate categories

with the prior  $\kappa \sim G(8, 1)$ . The prior for among site rate variation  
was  $\alpha \sim G(4, 8)$ . A time unit of 1000 was used with a substitution  
rate prior of  $G(5, 1000)$ , meaning the mean was  $5 \times 10^{-6}$  per base  
per day. For the LS analysis, latent integration times had the same  
bounds of 10 years prior to diagnosis and the sample times.

For the Abrahams et al. dataset, the LS and HIVtree analyses  
bounded the latent times at the infection times and the sample  
times. In the HIVtree analysis, an HKY+ $\Gamma$  model was used with  
5 rate categories with the prior  $\kappa \sim G(8, 1)$ . The prior for among  
site rate variation was  $\alpha \sim G(4, 8)$ . A time unit of 1000 was used  
with a substitution rate prior of  $G(2, 200)$ , meaning the mean was  
 $10^{-5}$  per base per day. The root age prior was  $G(0.25, 110)$  for all  
datasets. This prior was chosen to have a relatively wide variance  
on the root age with a mean slightly before the infection time as well  
as a large variance on the latent integration times. As described in  
the Prior Model section, the root ages are older than the given prior  
when run without data, and they are also different for each dataset.  
When running the MCMC under the prior, small changes to the  
prior appeared to cause little change to the posterior distribution  
of the latent integration times. A full description of the MCMC  
convergence criteria is provided in SI sections 9 and 10 for the Jones  
et al. and Abrahams et al. datasets, respectively. The Jones et al.  
dataset only sampled one gene, so estimates from multiple genes  
could not be combined. The estimates from multiple genes for the  
Abrahams et al. dataset were only combined for the tree with 10  
non-latent sequences per sampling time and sites with gaps in over  
75% of the sequences were removed from the alignment.

**Program availability.** The gene tree and the DNA simulation software  
packages are available at:

<https://github.com/nage0178/HIVtreeSimulations>

The HIVtree software package is available at:

<https://github.com/nage0178/HIVtree>

Scripts to produce the results in this paper are available at:

<https://github.com/nage0178/HIVtreeAnalysis>

**ACKNOWLEDGMENTS.** A.N. was supported by the National  
Science Foundation Graduate Research Fellowship Program under  
Grant No.2036201. This research was supported by National  
Institutes of Health Grant GM123306 to B.R.

1. RT Davey, et al., HIV-1 and T cell dynamics after interruption of highly active antiretroviral therapy (HAART) in patients with a history of sustained viral suppression. *Proc. Natl. Acad. Sci.* **96**, 15109–15114 (1999).
2. DD Ho, et al., Rapid turnover of plasma virions and CD4 lymphocytes in HIV-1 infection. *Nature* **373**, 123–126 (1995).
3. X Wei, et al., Viral dynamics in human immunodeficiency virus type 1 infection. *Nature* **373**, 117–122 (1995).
4. JD Siliciano, et al., Long-term follow-up studies confirm the stability of the latent reservoir for HIV-1 in resting CD4+ T cells. *Nat. Medicine* **9**, 727–728 (2003).
5. C Dufour, P Gantner, R Fromentin, N Chomont, The multifaceted nature of HIV latency. *J. Clin. Investig.* **130**, 3381–3390 (2020).
6. RF Siliciano, WC Greene, HIV latency. *Cold Spring Harb. Perspectives Medicine* **1**, a007096 (2011).
7. TW Chun, et al., Early establishment of a pool of latently infected, resting CD4+ T cells during primary HIV-1 infection. *Proc. Natl. Acad. Sci.* **95**, 8869–8873 (1998).
8. JB Whitney, et al., Rapid seeding of the viral reservoir prior to SIV viraemia in rhesus monkeys. *Nature* **512**, 74–77 (2014).
9. C Verhofstede, et al., Drug-resistant variants that evolve during nonsuppressive therapy persist in HIV-1-infected peripheral blood mononuclear cells after long-term highly active antiretroviral therapy. *J. Acquir. Immune Defic. Syndr.* **35**, 473–483 (2004).
10. J Brodin, et al., Establishment and stability of the latent HIV-1 DNA reservoir. *Elife* **5**, e18889 (2016).
11. MR Abrahams, et al., The replication-competent HIV-1 latent reservoir is primarily established near the time of therapy initiation. *Sci. Transl. Medicine* **11**, eaaw5589 (2019).
12. MD Pankau, et al., Dynamics of HIV DNA reservoir seeding in a cohort of superinfected Kenyan women. *PLoS Pathog.* **16**, e1008286 (2020).
13. BR Jones, et al., Phylogenetic approach to recover integration dates of latent HIV sequences within-host. *Proc. Natl. Acad. Sci.* **115**, E8958–E8967 (2018).
14. KM Bruner, et al., Defective proviruses rapidly accumulate during acute HIV-1 infection. *Nat. Medicine* **22**, 1043–1049 (2016).
15. BR Jones, JB Joy, Simulating within host human immunodeficiency virus 1 genome evolution in the persistent reservoir. *Virus Evol.* **6** (2020).
16. BR Jones, AFY Poon, node.dating: dating ancestors in phylogenetic trees in R. *Bioinformatics* **33**, 932–934 (2017).
17. TH To, M Jung, S Lycoett, O Gascuel, Fast dating using least-squares criteria and algorithms. *Syst. Biol.* **65**, 82–97 (2016).

- 628 18. T Stadler, Z Yang, Dating phylogenies with sequentially sampled tips. *Syst. Biol.* **62**, 674–688  
629 (2013).
- 630 19. A Rambaut, Estimating the rate of molecular evolution: incorporating non-contemporaneous  
631 sequences into maximum likelihood phylogenies. *Bioinformatics* **16**, 395–399 (2000).
- 632 20. SG Deeks, J Overbaugh, A Phillips, S Buchbinder, HIV infection. *Nat. Rev. Dis. Primers* **1**,  
633 1–22 (2015).
- 634 21. AN Phillips, Reduction of HIV concentration during acute infection: Independence from a  
635 specific immune response. *Science* **271**, 497–499 (1996).
- 636 22. MA Nowak, CRM Bangham, Population dynamics of immune responses to persistent viruses.  
637 *Science* **272**, 74–79 (1996).
- 638 23. AS Perelson, RM Ribeiro, Modeling the within-host dynamics of HIV infection. *BMC Biol.* **11**,  
639 96 (2013).
- 640 24. MA Stafford, et al., Modeling plasma virus concentration during primary HIV infection. *J.*  
641 *Theor. Biol.* **203**, 285–301 (2000).
- 642 25. B Rannala, Conceptual issues in Bayesian divergence time estimation. *Philos. Transactions*  
643 *Royal Soc. B: Biol. Sci.* **371**, 20150134 (2016).
- 644 26. T Flouri, X Jiao, B Rannala, Z Yang, Species tree inference with BPP using genomic se-  
645 quences and the multispecies coalescent. *Mol. Biol. Evol.* **35**, 2585–2593 (2018).
- 646 27. Z Yang, B Rannala, Bayesian estimation of species divergence times under a molecular clock  
647 using multiple fossil calibrations with soft bounds. *Mol. Biol. Evol.* **23**, 212–226 (2006).
- 648 28. AG Rodrigo, J Felsenstein, *The Evolution of HIV*. (The John Hopkins University Press), pp.  
649 233–267 (1999).
- 650 29. VN Minin, EW Bloomquist, MA Suchard, Smooth skyride through a rough skyline: Bayesian  
651 coalescent-based inference of population dynamics. *Mol. Biol. Evol.* **25**, 1459–1471 (2008).
- 652 30. S Tavaré, et al., Some probabilistic and statistical problems in the analysis of DNA se-  
653 quences. *Lect. on mathematics life sciences* **17**, 57–86 (1986).
- 654 31. Z Yang, Maximum-likelihood estimation of phylogeny from DNA sequences when substitution  
655 rates differ over sites. *Mol. biology evolution* **10**, 1396–1401 (1993).
- 656 32. M Hasegawa, H Kishino, T Yano, Dating of the human-ape splitting by a molecular clock of  
657 mitochondrial DNA. *J. Mol. Evol.* **22**, 160–174 (1985).
- 658 33. AM Kozlov, D Darriba, T Flouri, B Morel, A Stamatakis, RAxML-NG: a fast, scalable and user-  
659 friendly tool for maximum likelihood phylogenetic inference. *Bioinformatics* **35**, 4453–4455  
660 (2019).
- 661 34. E Paradis, J Claude, K Strimmer, APE: Analyses of phylogenetics and evolution in R lan-  
662 guage. *Bioinformatics* **20**, 289–290 (2004).
- 663 35. J Moss, M Tveten, kdensity: An R package for kernel density estimation with parametric  
664 starts and asymmetric kernels. *J. Open Source Softw.* **4**, 1566 (2019).
- 665 36. JM Pavia, Testing goodness-of-fit with the kernel density estimator: GoFKernel. *J. Stat. Softw.*  
666 **66**, 1–27 (2015).

DRAFT



# 1 **Supplementary Information for**

## 2 **Bayesian Phylogenetic Inference of HIV Latent Lineage Ages Using Serial Sequences**

3 **Anna Nagel and Bruce Rannala**

4 **Corresponding Author Anna Nagel.**

5 **E-mail: [aanagel@ucdavis.edu](mailto:aanagel@ucdavis.edu)**

### 6 **This PDF file includes:**

7     Supplementary text

8     Figs. S1 to S28

9     Tables S1 to S2

10    SI References

## 11 Supporting Information Text

### 12 1. Deterministic Model

13 Here we describe the deterministic model of HIV population dynamics that will serve as the large-population analog of our  
 14 stochastic model (see below). Let  $T(t)$  be the number of uninfected target cells at time  $t$ . Let  $T^*(t)$  be the number of  
 15 productively infected cells at time  $t$ . Let  $L(t)$  be the number of latently infected, replication-incompetent cells at time  $t$ . Let  
 16  $L^*(t)$  be the number of latently infected, replication-competent cells at time  $t$ . Let  $V(t)$  be the number of virions at time  
 17  $t$  (S1). Actively infected target cells that are replication-incompetent are not modeled. Define  $\lambda$  to be the rate at which  
 18 uninfected target cells are produced and  $d$  to be the per cell rate at which they die. Let  $\delta$  be the per cell rate at which actively  
 19 infected cells die. Latent replication-competent cells and replication-incompetent cells die at constant per cell rates of  $\sigma$  and  $\tau$ ,  
 20 respectively. Let  $\gamma$  be the proportion of newly infected cells that are replication-incompetent. Let  $\eta$  be the proportion of newly  
 21 infected cells that are latently infected and  $(1 - \eta)$  be the proportion of newly infected cells that are actively infected. Let  $\kappa$   
 22 be the rate constant for target cells becoming infected cells. Productively infected cells must be replication-competent and  
 23 are produced at a rate equal to product of the rate constant  $\kappa$ , the number of virions, the number of uninfected cells, the  
 24 proportion of cells that are replication-competent, and the proportion of cells that are actively infected. The rate of production  
 25 of latent replication-competent cells is calculated similarly, except that the proportion of cells that are latently infected is  
 26 used rather than the actively infected population. For replication-incompetent latent cells, the rate of production is equal  
 27 to the product of the rate constant  $\kappa$ , the number of virions, the number of uninfected cells, the proportion of cells that are  
 28 replication-incompetent, and the proportion of cells that are latently infected. When an infected cell is produced, an uninfected  
 29 cell is lost, since the uninfected cell becomes the infected cell. This is true for actively infected cells and both types of latently  
 30 infected cells.

31 Latent replication-competent cells can reactivate and become actively infected cells. This occurs at a constant per cell rate  
 32 of  $\alpha$ . HIV virions,  $V$ , are produced at a rate proportional to the concentration of actively infected cells, with rate constant  $\pi$ .  
 33 The virions are cleared at a constant per virion rate of  $c$ . This model gives the following set of equations:

$$34 \quad \frac{dT(t)}{dt} = \lambda - dT(t) - (1 - \gamma(1 - \eta))\kappa T(t)V(t) \quad [1]$$

$$35 \quad \frac{dT^*(t)}{dt} = (1 - \eta)(1 - \gamma)\kappa T(t)V(t) - \delta T^*(t) + \alpha L^*(t) \quad [2]$$

$$36 \quad \frac{dV(t)}{dt} = \pi T^*(t) - cV(t) \quad [3]$$

$$37 \quad \frac{dL^*(t)}{dt} = (1 - \gamma)\eta\kappa T(t)V(t) - \alpha L^*(t) - \sigma L^*(t) \quad [4]$$

$$38 \quad \frac{dL(t)}{dt} = \gamma\eta\kappa T(t)V(t) - \tau L(t) \quad [5]$$

39 The solutions to these equation are obtained by numerical analysis using the function `ode` in the R package `deSolve` (1).

### 44 2. Stochastic model

45 Viral dynamics were modeled using a continuous-time Markov chain with instantaneous rates as previously described in the  
 46 deterministic model. For example, let  $A$  be the event that a birth of an uninfected cell occurs in the time interval  $\Delta t$ . Then,

$$47 \quad P(A) = \lambda \Delta t \quad [6]$$

The process is modeled as a jump chain. Only one event can occur in a small interval  $\Delta t$ , and the number of viruses, or of any  
 cell type, can only change by one in that interval. The waiting time between birth events of uninfected cells is exponentially  
 distributed with mean waiting time  $\frac{1}{\lambda}$ . The instantaneous rates and waiting time between other events are determined similarly.  
 The total rate of events,  $R(t)$ , is given by the sum of the rates of all possible events.

$$48 \quad R(t) = \lambda + (d + (1 - \gamma(1 - \eta))\kappa V(t))T(t) + (\delta + \pi)T^*(t) \\ 49 \quad + (\alpha + \sigma)L^*(t) + \tau L(t) + cV(t) \quad [7]$$

50 The waiting time between any event is exponentially distributed with mean  $\frac{1}{R(t)}$ . Given that an event occurs, the probability  
 the event was a birth of an uninfected cell, for example, is given by the ratio of the rate of birth events of uninfected cells and  
 the total rate of events,  $\frac{\lambda}{R(t)}$ . The probabilities of other events are determined similarly.

### 51 **3. Simulation of tree topologies**

52 The stochastic model was implemented as a C program. In the program, the parent daughter relationship of all of the viruses  
53 in a tree structure is tracked. The cell or virus type (e.g. T\*, V, L, or L\*) is also tracked. The simulation is initialized with  
54 a single actively infected cell. Each time a virus is born, an actively infected cell is randomly selected to branch into two  
55 daughter lineages. One lineage is an actively infected cell and the other an active virus. Each time a virus or cell dies, an  
56 existing virus or cell of that type is randomly removed from the tree. When a virus latently infects a cell, a virus is randomly  
57 chosen to branch into an infected cell and a virus. This is designed to follow the conventional ODE models, even though a  
58 single virus cannot infect multiple cells in real systems. This is likely inconsequential, since the waiting time for a virus to  
59 die is short, and thus the probability a virus infects multiple cells is very small. Replication-competent latent viruses may be  
60 reactivated, meaning they become actively infected cells. Extinction is considered to be analogous to a failure to establish  
61 infection. In this case, the simulation is restarted. At pre-specified times, a pre-specified number of active viruses and latently  
62 infected cells are sampled. Replication-competent and incompetent cells are not distinguished during sampling. Sampling is  
63 equivalent to a death event for all sampled lineages.

### 64 **4. Parameter Values**

65 Parameter values were determined using empirical estimates. Since many of the parameters are not independent and choosing  
66 parameters independently can lead to unrealistic patterns of viral load change over time, parameters obtained from a single  
67 patient and study were used for as many of the parameters as possible (2). The remaining parameters are taken from the  
68 literature (S1).  $\eta$  is fixed such that there are  $1.4 \times 10^6$  replication competent latent cells in 5L of blood at equilibrium (3). The  
69 initial concentration of uninfected target cells is assumed to be 10 cell/ $\mu$ L (2). Initially there is a single actively infected cell.  
70 All other cell and virus populations have size zero.

71 In principle, the simulation method described above would allow the entire viral population within a host to be simulated.  
72 However, this is not computationally tractable due to the simulation time and memory usage. ODEs of viral dynamics in HIV  
73 typically describe the changes in concentrations of cells and viruses per mL of blood. If properties of the viral genealogies  
74 become independent of the simulation size as the simulation size increases, it may be reasonable to use a simulation volume  
75 much smaller than the total blood volume in an adult. To determine whether this was the case, the impact of simulation size  
76 was examined by simulating genealogies generated with different blood volumes while keeping the number sampled sequences  
77 constant. Tree length increases and then plateaus as the simulation size increases. Other tree metrics, including root age and  
78 total time spent in latency, also showed no trend with volume (S2). Thus, 100 mL was used as the simulation volume.

### 79 **5. Agreement between the deterministic and stochastic models**

80 For large population sizes, the stochastic model and the deterministic (ODE) model are expected to produce similar results for  
81 the population size as a function of time given the parameters and initial values are such that the population does not go  
82 extinct in the stochastic simulation. This is because we have designed the stochastic simulator to have an expected population  
83 size equal to the predicted population size for the deterministic model at any point in time and the relative variance of the  
84 stochastic model decreases with increasing population size. Populations sizes are in good agreement when there is no extinction  
85 (S3). Cases of extinction are common, but are not considered further.

### 86 **6. Estimation of DNA substitution model parameters**

87 To select DNA substitution model parameters to use in the simulations, parameters were inferred from empirical datasets for  
88 four genomic regions using MCMCtree (4). Alignments for *nef*, *tat*, *CIV2*, and *p17* were taken from a studies on longitudinal  
89 Cytotoxic T-lymphocyte (CTL) responses from the LANL HIV special interest alignments (5–7). This patient (code PIC1362)  
90 was infected in 1998, was a homosexual male, and participated in a study at University of Washington Primary Infection Clinic.  
91 The patient had sequences samples taken at 18 time points and was untreated at the time of the study.

92 To root the tree, sequences from four patients were selected using the LANL database to use as outgroups (GenBank  
93 accession numbers: AY331284, AY331289, AB078005, JN024426). The best outgroup is not always clear in phylogenetic studies.  
94 Multiple outgroups were used to compare of the effect of rooting on substitution rate estimates. All four of these patients were  
95 infected within 2 years of PIC1362, were likely infected on the west coast of the United States, has sexual transmission as a risk  
96 factor, were untreated at the time of sampling, and had all four genomic regions were available. The outgroup sequences were  
97 combined with the existing alignments using the SychAlign tool on the LANL HIV database. This resulted in 16 alignments,  
98 one for each gene outgroup pair. Then, sites with more than 75% gaps were removed from the sequences using a custom R  
99 script. This was done to remove problematic regions of the alignments, particularly in *CIV2*.

100 To obtain parameter estimates, maximum likelihood trees were inferred with RAxML-ng (8) under an HKY+ $\Gamma$  model (9, 10)  
101 and outgroup rooted. The outgroups were removed from each of the alignments and the maximum likelihood trees. MCMCtree  
102 was used to infer the substitution model parameters and substitution rate for each gene with each outgroup rooting (4). An  
103 HKY+ $\Gamma$  model with 15 rate categories was used. The prior for  $\kappa$  in the HKY model was G(8, 1). The prior for among site rate  
104 variation was  $\alpha \sim G(1, 1)$ . A time unit of 1000 was used with a rate prior of G(2, 200), or  $10^{-6}$  substitutions per base per day.  
105 A birth-death-sequential-sampling model was used with parameters  $\lambda = 2$ ,  $\mu = 1$ ,  $\rho = 0$ , and  $\psi = 1.8$  (11). A root age prior  
106 was U(1, 10), meaning the root age was 1000 to 10000 days prior to the last sample time, with 0.01 tail probabilities (12).

5 replicates of MCMCtree were run for each gene outgroup pair. Each MCMC was run with a burnin of 1000, sample frequency of 2, and 10000 samples. The estimates from each of the 5 replicate MCMCtree runs were similar in all cases, indicating the MCMC converged. The point estimate of the substitution rate and the 95% HPD interval bounds for the substitution rate were averaged over the 5 replicates. In most cases, each outgroup produced similar mutation rate estimates for a given gene. The outgroup rooting with the smallest 95% HPD interval of the substitution rate divided by substitution rate was used to provide parameters for DNA simulation. However, for *nef*, outgroup 1006 had a much different rooting than the other outgroups. CS2 and PIC55751 had the same root location. Of those two, the one with the smaller 95% HPD interval of the substitution rate divided by substitution rate was used. This resulted in JN024426 being selected as the outgroup for all genes. The first replicate MCMC run of MCMCtree with JN024426 as the outgroup rooting was used for parameters estimates for each gene. This included the estimates of  $\alpha$ ,  $\kappa$ ,  $\mu$ , and the stationary frequencies (S2).

The HXB2 sequence was used at the root sequence for the simulation of each region (S2). However, no bases were removed inside the sequence, as done in the original alignment in regions with over 75% gaps. An HKY model was used for the simulation since the parameters inferences were made with an HKY model MCMCtree.

## 7. MCMC settings for Simulation Analysis

For each of the simulated datasets, HIVtree was run with two seeds. The MCMC was sampled every other iteration for 30,000 samples with a burn in of 2,500. Thus a total of  $30000 \times 2 + 2500 = 62,500$  iterations were run. The internal node ages of the two replicate MCMCs were compared for each analysis. If the mean age difference between the two replicate MCMCs was more than 10 days for more than 10 internal nodes, 20 days for more than 5 internal nodes, or 100 for any internal nodes, the MCMCs are considered to not have converged. A total of 347 pairs of MCMCs did not converge out of 36,000 pairs run. For each pair of MCMCs that did not converge, another 2 MCMCs were run with different seeds with 60,000 samples. Of those, 18 pairs of MCMCs did not converge. Those MCMCs were rerun again with different seeds, a burnin of 10000 iterations, and were run for 240,000 iterations, sampling every other iteration. All of these runs met the above convergence criteria except one. This was a simulated *nef* dataset and was removed from all analyses.

## 8. Combining Posteriors

**A. Example: Sample from a Bivariate Normal PDF.** Suppose that we have samples  $Y = y_1, \dots, y_a$  and  $X = x_1, \dots, x_b$  from a bivariate normal density with means  $\mu_y = \mu_x = \mu$ , variances  $\sigma_x^2 = \sigma_y^2 = 1$  and correlation parameter  $\rho$ . Our goal will be to generate the posterior density of  $\mu$  by combining posterior densities for  $x$  and  $y$ . We will treat the variables  $Y$  and  $X$  as independent in our inference procedure, though in reality  $\rho$  may be non-zero. For simplicity, we use a normal prior density for  $\mu$ , which is a conjugate prior for the normal density and so the posterior is also normal. Suppose that  $Y \sim \mathcal{N}(\mu, 1)$  and  $X \sim \mathcal{N}(\mu, 1)$ . Let the prior for  $Y$  be  $f_y(\mu) \sim \mathcal{N}(\mu_1, \sigma_1^2)$  and the prior for  $X$  be  $f_x(\mu) \sim \mathcal{N}(\mu_2, \sigma_2^2)$ . The “preferred prior” for use in generating the posterior based on both  $X$  and  $Y$  is  $f_p(\mu) \sim \mathcal{N}(\mu_p, \sigma_p^2)$ . The posteriors are then

$$f(\mu|Y) \sim \mathcal{N}\left(\frac{\frac{\mu_1}{\sigma_1^2} + a\bar{y}}{\frac{1}{\sigma_1^2} + a}, \frac{\sigma_1^2}{1 + a\sigma_1^2}\right)$$

and

$$f(\mu|X) \sim \mathcal{N}\left(\frac{\frac{\mu_2}{\sigma_2^2} + b\bar{x}}{\frac{1}{\sigma_2^2} + b}, \frac{\sigma_2^2}{1 + b\sigma_2^2}\right)$$

The approximation of the posterior of  $\mu$ , given  $X$  and  $Y$ , is then

$$f(\mu|X, Y) = \frac{f(\mu|X)f(\mu|Y)}{f_y(\mu)f_x(\mu)} \times f_p(\mu) \times \frac{C_x C_y}{C_{xy}} \quad [8]$$

The true posterior is known in this case when  $\rho = 0$ . Let  $Z = X \cup Y$  and  $n = a + b$ , then

$$f(\mu|X, Y) \sim \mathcal{N}\left(\frac{\frac{\mu_p}{\sigma_p^2} + n\bar{z}}{\frac{1}{\sigma_p^2} + n}, \frac{\sigma_p^2}{1 + n\sigma_p^2}\right) \quad [9]$$

This simple case can be used to test methods for inferring the posterior from combined samples. Rather than doing MCMC, instead simply sample iid random variables from  $f(\mu|Y)$ ,  $f(\mu|X)$ ,  $f_y(\mu)$ , and  $f_x(\mu)$  and use kernel density estimation to infer the density functions for each. Then apply equation 8 to estimate the posterior. The accuracy of the estimate can be determined by comparison with results from equation 9. For example, curves could be plotted for the true density versus the approximation. The approximate density will need to be renormalized so that it integrates to 1. The constant,  $C$ , to multiply values by to normalize could be estimated as

$$\frac{1}{C} = \int \frac{f(\mu|X)f(\mu|Y)}{f_y(\mu)f_x(\mu)} \times f_p(\mu) d\mu.$$

152 **B. Numerical Issues Combining Posteriors.** In a small number of cases, numerical issues arose when combining posteriors as  
153 using the packages described in the main text. In one case, no error messages resulted but the proportionality constant was on  
154 the order of  $10^{-12}$ . Likely due to numerical issues, this caused the mean latent integration time to be estimated to a value on  
155 the order of  $10^6$ , which has zero prior probability. This latent integration inference was removed from the analysis. Out of  
156 inferences for 90,000 latent integration times, 63 other analyses combining latent integration times from all four gene produced  
157 error messages related to non-integrable functions, and did not produced an estimate. This occurred for 8 latent times in the  
158 analysis of two genes only. These cases were removed from further analysis. These likely result when the posterior distributions  
159 from different genes are non-overlapping.

## 160 **9. Empirical Analysis of the Jones et al. dataset**

161 Sequences originally published by Jones et al. (2018) were taken from GenBank (accession nos. MG822917-MG823179), and  
162 separated into patient 1 and patient 2 (13). The sequences from patient 1 were aligned using mafft (version 7.453) using the  
163 default settings (14). The sequences from patient 2 did not need to be aligned. The relative sample dates were determined  
164 using the collection date.

165 HIVtree was run with a burnin of 5,000 iterations, with 70,000 samples, sampling every other iteration. Two replicate  
166 MCMCs were run for each dataset. Convergence was checked by confirming no more than 5% of the mean internal nodes ages  
167 differed by more than 10 days between replicate MCMCs, 2.5% differed by more than 20 days, or any of the internal nodes  
168 differed by more than 100 days. Both pairs of MCMCs met this convergence criteria.

## 169 **10. Empirical Analysis of the Abrahams et al. dataset**

170 Alignments for patients 217 and 257 originally published by Abrahams et al. (2019) were available from [https://github.com/veg/ogv-](https://github.com/veg/ogv-dating/tree/master/results/alignments)  
171 [dating/tree/master/results/alignments](https://github.com/veg/ogv-dating/tree/master/results/alignments) (15). There were multiple alignments for each data set and the "fasta\_combined.msa"  
172 alignments were used. The week of sampling is included in the sequence name. Using the supplemental data table, the relative  
173 dates of sampling in units of days were determined. For some patients, there were multiple visit dates in the same week. In  
174 this case, the first visit date was used as the sample date for all sequences collected during that week. For each alignment,  
175 sequences were subsampled to include 10, 15, or 20 sequences from each pre-ART each collection time point and all outgrowth  
176 virus sequences. If less than the desired number of sequences were available at a given time point, all of the available sequences  
177 were used. While the sequences were aligned, some of the alignments had many gaps. Sites in the alignments were removed if  
178 they had more than 75%, 85%, or 95% gaps. Thus, for each of 8 starting alignments, 9 alignments were created. However, some  
179 of the alignments with gap removal were identical. Thus, a total of 46 unique alignments were created. HIVtree requires the  
180 sampling date to be at the end of the sequence name. Thus, the sequence names from the original publications were modified  
181 for our analyses.

182 Two replicate runs of HIVtree were run for each analysis. A burnin of 8,000 was used with samples taken every other  
183 iterations for a total of 80,000 samples. Thus, the MCMC was run for 168,000 iterations. Convergence of the MCMCs was  
184 checked by comparing the mean ages of the internal node ages. If more than 5% of the mean internal nodes ages differed by  
185 more than 10 days between replicate MCMCs, 2.5% differed by more than 20 days, or any of the internal nodes differed by  
186 more than 100 days, the MCMC was considered to not have converged. Two pairs of MCMCs did not converge. These were  
187 rerun with a total of 150,000 samples, sampling every other iteration with a burnin of 8,000 iterations. Convergence was  
188 checked again with the same criteria as previously. Both pairs MCMCs had converged.

189 Each figure (S9 - S24) show the inferred integration date for each method, LR, LS, ML, and HIVtree. Each figure is for a  
190 single patient and gene. Some figures have two levels of gap removal instead of three because gap removal at different levels  
191 resulted in identical alignments. Thus, only the non-redundant results are shown. The gene names (e.g. ENV\_4, NEF\_1)  
192 match those in the original alignment names.

## 193 **11. Effect of the number of non-latent samples on method performance**

194 The effect of tree size on the inference of latent samples was examined by changing the number of non-latent samples at each  
195 sample time. Using the simulated trees and alignments used in the main simulation analysis, the subsampling was changed  
196 from having 10 to 10, 15 or 20 non-latent sequence sampled every year for ten years. This results in a larger phylogenetic  
197 tree with the same number of latent sequences for each tree. Each tree was subsampled only one time for each number of  
198 non-latent sequences, rather than three times in the main analysis. The number of non-latent sequences at each sampling  
199 time does not have a large impact on bias (S25), MSE (S26), size of the 95% confidence intervals (S27), or the probability the  
200 inferred integration times fall within the 95% confidence intervals or credible sets (S28) for any of the methods.

201 As preliminary analysis did not show any trend with the other methods, this analysis was only run for the *p17* datasets  
202 with HIVtree. For the analyses with HIVtree, the priors were the same as in the main simulation analyses with HIVtree. The  
203 MCMCs were run with a burnin of 5,000 iterations, sampling every other iteration and sampling a total of 50,000 times. Two  
204 replicate MCMCs were run for each analysis. The difference between the mean times of the internal nodes was compared. The  
205 MCMCs were considered to have converged if this difference was no more than 10 days for at most 10% of the internal nodes,  
206 20 days for at most 5% of the internal nodes, and no more than 100 days for any of the internal nodes. 10 pairs of MCMCs did  
207 not converge. These were run again with a burnin of 10,000 iterations, sampling 100,000 times with sampling every other  
208 iteration. The above convergence criteria were checked again. All MCMCs were considered to have converged.

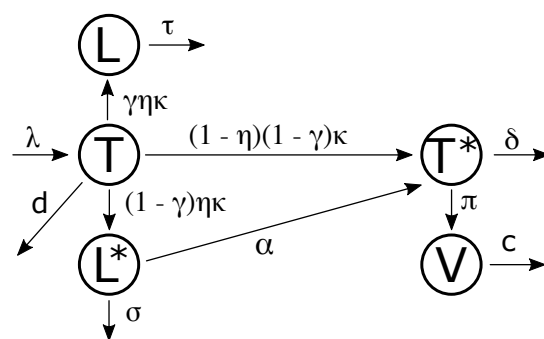

Fig. S1. Within-host viral dynamics model

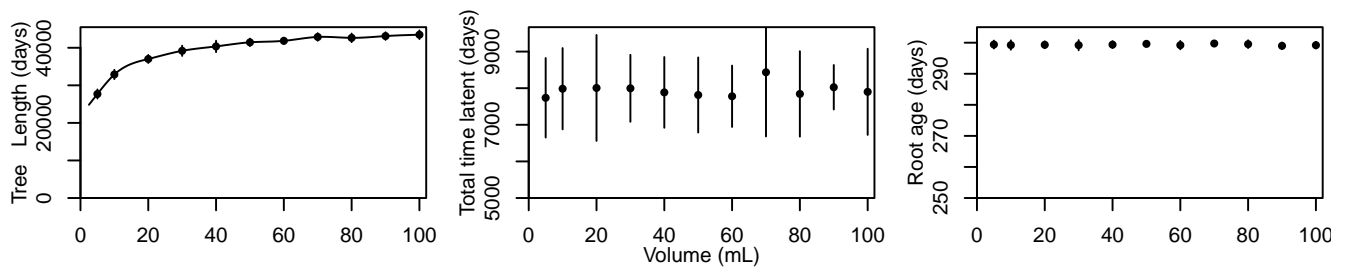

**Fig. S2.** Impact of simulation volume on properties of genealogies. 50 active and 20 latent viruses were sampled at 75, 100, 200, and 300 days. 10 simulations were run for each simulation volume. Other simulation parameters match those in S1. Standard error is shown.

**Table S1. Simulation parameters**

| Parameter | Description                                                | Value                                                                      |
|-----------|------------------------------------------------------------|----------------------------------------------------------------------------|
| $\lambda$ | Birth rate of uninfected cells                             | $170 \frac{\text{cell}}{\text{mL} \times \text{day}}$ (2)                  |
| $d$       | Death rate of uninfected cells                             | $0.017 \frac{1}{\text{day}}$ (2)                                           |
| $\kappa$  | Transition rate from uninfected to actively infected cells | $8.0 \times 10^{-7} \frac{\text{mL}}{\text{virion} \times \text{day}}$ (2) |
| $\delta$  | Death rate of actively infected cells                      | $0.31 \frac{1}{\text{day}}$ (2)                                            |
| $\pi$     | Viral birth rate                                           | $730 \frac{\text{virions}}{\text{cell} \times \text{day}}$ (2)             |
| $c$       | Viral clearance rate                                       | $3 \frac{1}{\text{day}}$ (2)                                               |
| $\eta$    | Proportion of newly infected cells that are latent         | $1.16 \times 10^{-3}$ (3)                                                  |
| $\alpha$  | Rate of activation of replication-competent, latent cells  | $5.7 \times 10^{-5} \frac{1}{\text{day}}$ (16, 17)                         |
| $\gamma$  | Proportion of viruses that are defective                   | 0.95 (18)                                                                  |
| $\sigma$  | Death rate of latent, replication-competent cells          | $5.2 \times 10^{-4} \frac{1}{\text{day}}$ (19)                             |
| $\tau$    | Death rate of latent, replication-incompetent cells        | $1.1 \times 10^{-4} \frac{1}{\text{day}}$ (19)                             |

The parameters from (2) are for patient 7.  $\kappa$  is typically estimated as the rate constant of new infections of replication-competent cells, which is  $\kappa(1 - \gamma)(1 - \eta)$  in this model. Thus, the empirical estimates of  $\kappa$ , as presented in the table, is divided by  $(1 - \gamma)(1 - \eta)$  to obtain the parameter value used in the model.



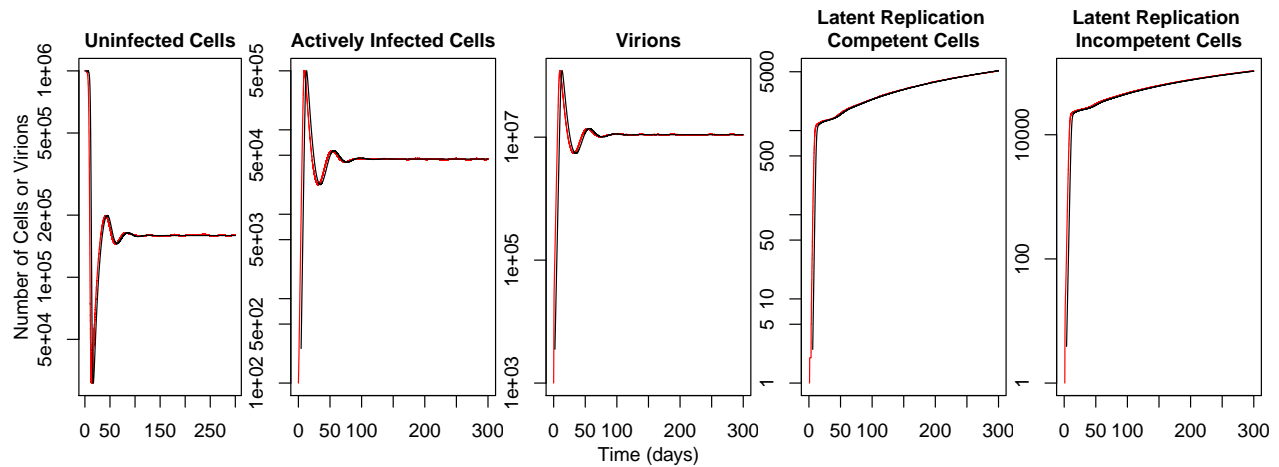

**Fig. S3.** Predicted population sizes in the deterministic model and observed population sizes in the stochastic model are very similar. For both models, a blood volume of 10 mL was modeled using the parameters listed in Table S1. The initial population sizes are  $10^4$  target cells/mL, 1 actively infected cell/mL, and 10 virions/mL. The deterministic model is shown in black, and one realization of the stochastic simulation is shown in red. In comparison to the initial conditions described in the text, a larger number of actively infected cells was used to limit the stochastic effects of small population sizes, allowing for a comparison when the virus is unlikely to become extinct.

**Table S2. DNA simulation parameters.  $\mu$  is in units of expected number of substitutions per day per base. The genes simulated do not cover the entire genes.**

| Region | HXB2 start | HXB2 end | $\mu$                 | $\alpha$ | $\kappa$ | $\pi_A$ | $\pi_C$ | $\pi_G$ | $\pi_T$  |
|--------|------------|----------|-----------------------|----------|----------|---------|---------|---------|----------|
| C1V2   | 6213       | 7037     | $3.56 \times 10^{-5}$ | 0.4294   | 6.9801   | 0.35322 | 0.17636 | 0.21123 | 0.259191 |
| nef    | 8797       | 9414     | $1.34 \times 10^{-5}$ | 0.4878   | 8.9138   | 0.30641 | 0.21240 | 0.28265 | 0.19853  |
| p17    | 817        | 1207     | $8.9 \times 10^{-6}$  | 0.5306   | 10.6361  | 0.39393 | 0.18392 | 0.25040 | 0.17175  |
| tat    | 5831       | 5962     | $9.9 \times 10^{-6}$  | 0.7283   | 7.1751   | 0.29841 | 0.21021 | 0.23449 | 0.25689  |

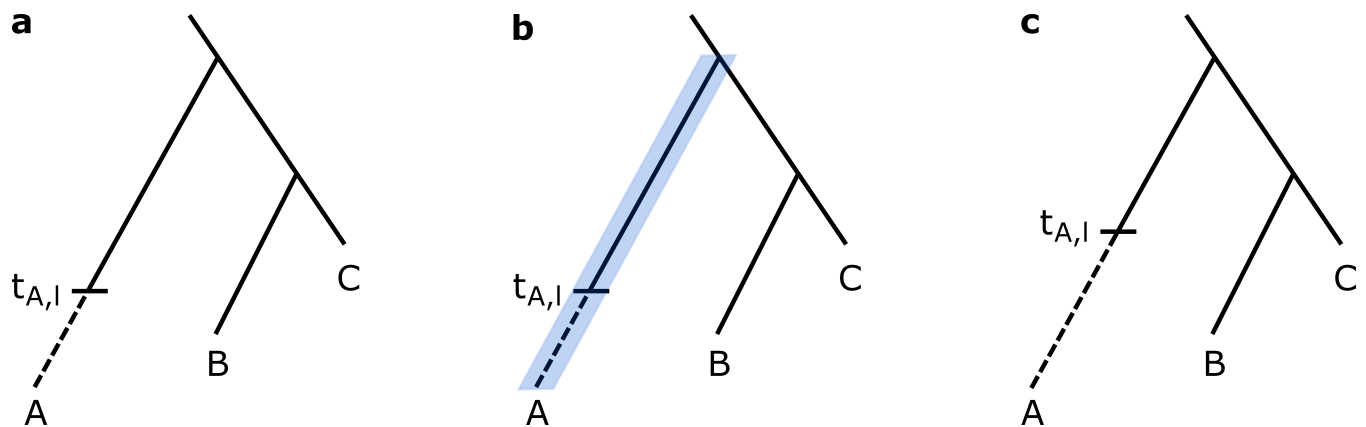

**Fig. S4.** Proposal steps in the MCMC for latency times. Tips B and C correspond to non-latent sequences. At some time in the past,  $t_{A,l}$ , lineage A became latent. The dashed line shows when the lineages was latent. (a) Starting from the current latent time, (b) a new time can be proposed anywhere between the sample time and the age of the parent node, shown in blue. (c) Once a time is proposed, the move can be accepted or rejected. In this case, the move is accepted and the time is updated. For the calculation of the likelihood, the branch lengths correspond to the length of the solid lines only.

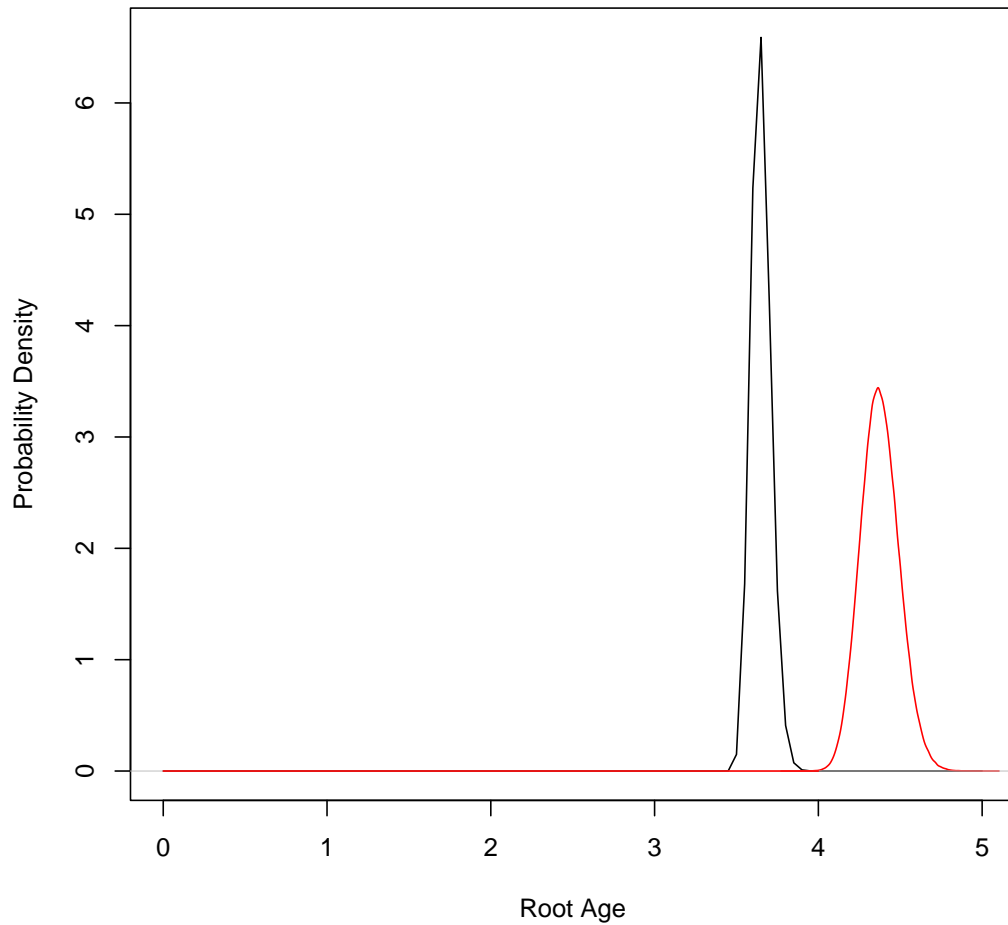

**Fig. S5.** The user input prior for the root age is not the same as the prior determined by running HIVtree without data. The black line shows the user input root age prior of Gamma(36.5, 100) on a tree with a last sample time of 3285 days before present with a time unit of 1000. This gives as mean root age of 3.65 in the time units used in HIVtree. This is the same as all of the simulated trees in our analyses. Using a simulated dataset for C1V2, a tree topology was inferred with RAxML and outgroup rooted. This tree was used to run HIVtree under the prior. The red line shows the results, in which the root age is older than the user input prior.

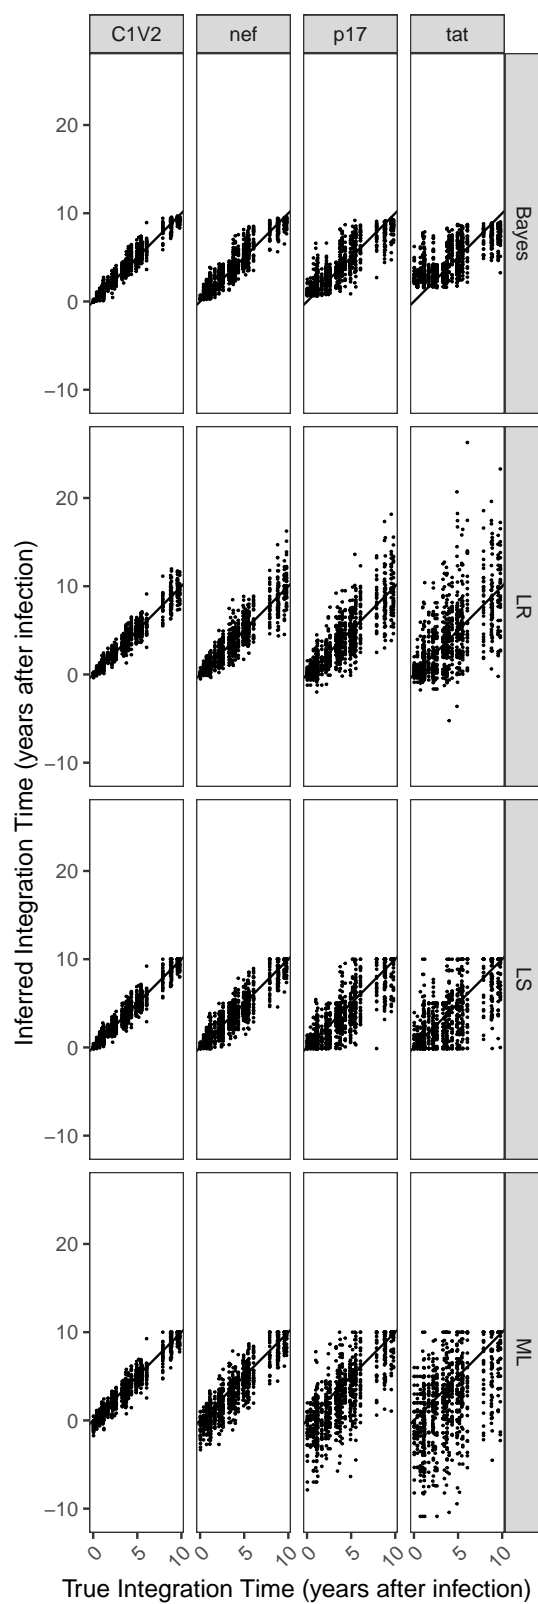

Fig. S6. For a fixed tree topology, there are 30 latent integration times for each of the 30 alignments for a given gene. The line has slope 1 and intercept 0.

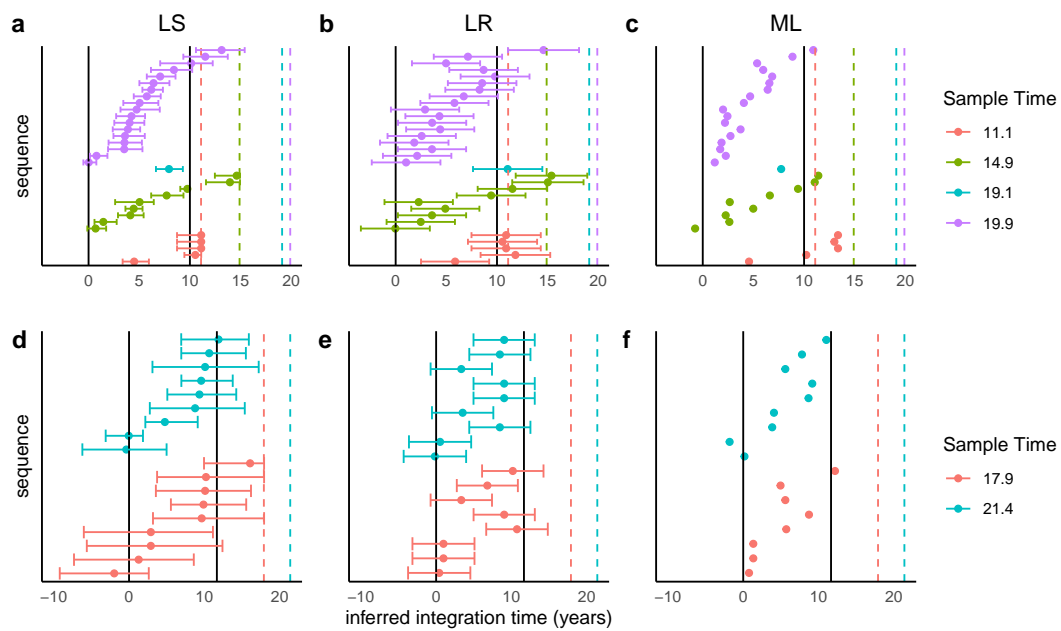

**Fig. S7.** (a-c) and (d-f) show the inferred integration dates for each sequence from patient 1 and 2, respectively. (a,d), (b,e), and (c,f) show inferences from LS, LR, and ML, respectively. The vertical lines show the first positive date (left) and start of cART (right). The bars show 95% confidence intervals for LS and LR. Confidence intervals are not inferred in the ML method. With sample time 11.1 for patient 1, three of the latent integration times inferred with ML and one with LR are after the sampling date. The LS method is bounded at the sample time, but those sequences are inferred to have been integrated at the sample time.

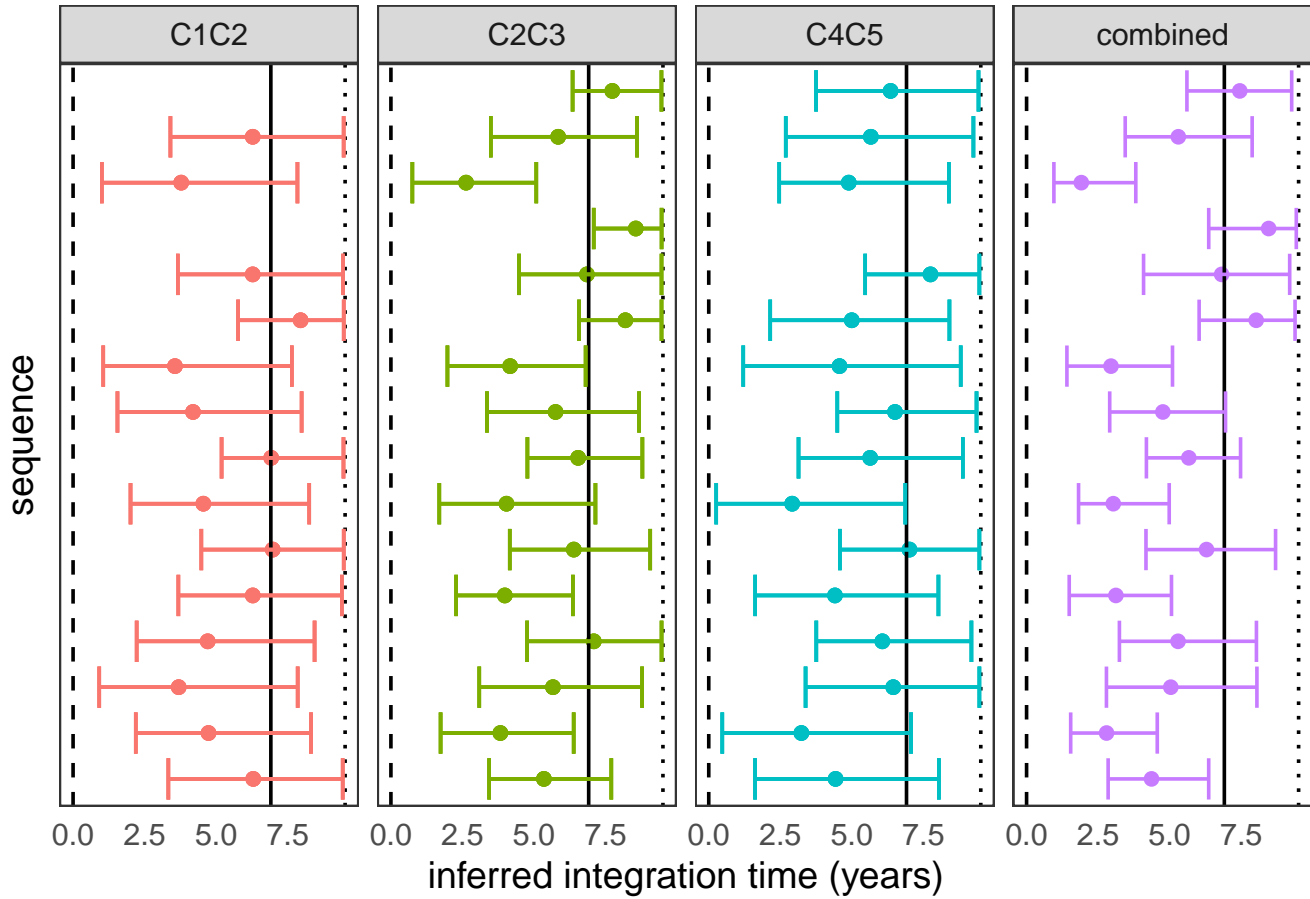

**Fig. S8.** Each of the left three panels shows the integration times inferred using HIVtree for a single sequence. The panel on the right shows the inferred integration times when the posterior estimate for the three sequences are combined. The results are from patient 217 (15). 10 non-latent sequence were used as each available timepoint and sites with more than 75% gaps were removed from the alignment prior to analysis, as described in SI section 10. The dashed line shows the infection time, the solid line shows the start of ART, and the dotted line shows the sample time.

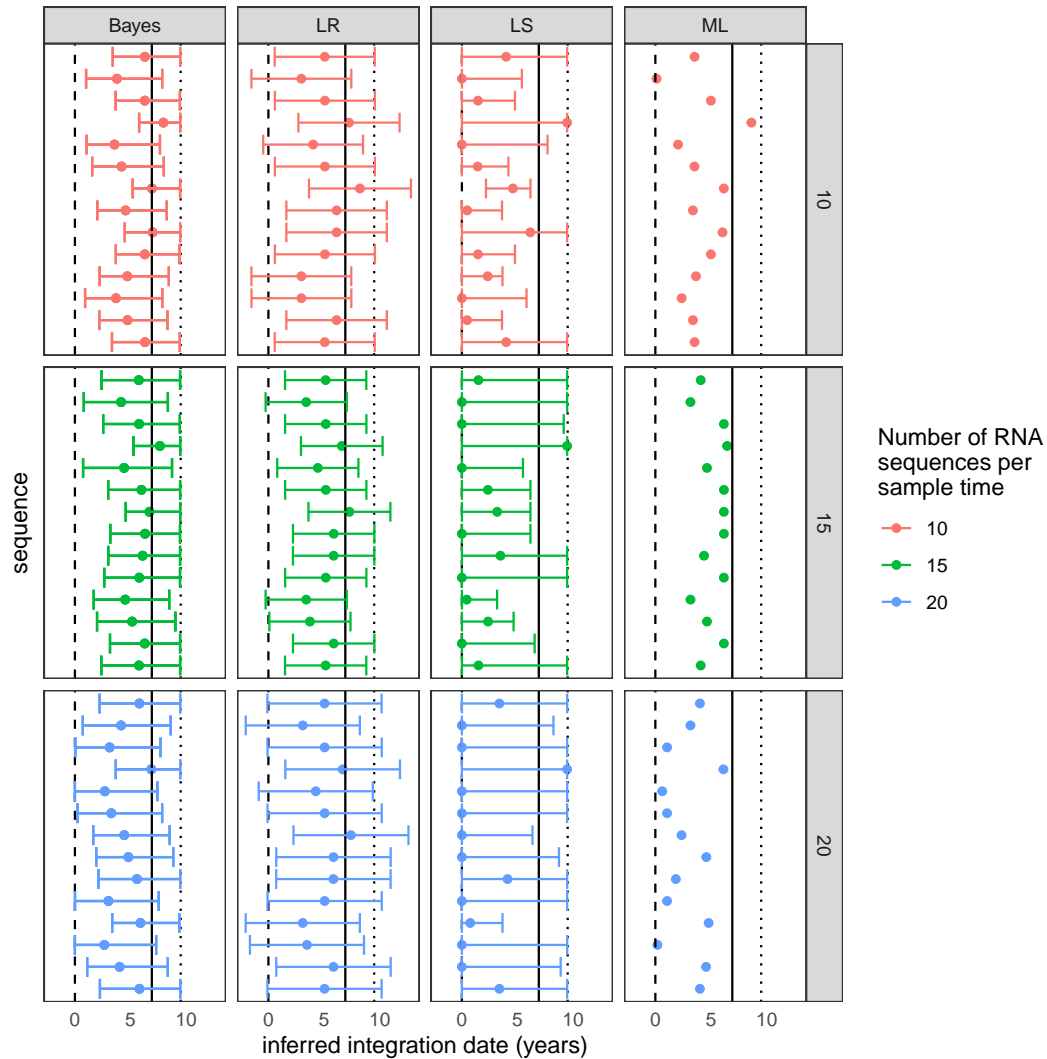

**Fig. S9.** The inferred latent integration dates for Env\_2 from patient 217 are shown for each method. 95% confidence intervals are shown for the LR and LS methods, and the 95% credible interval is shown for HIVTree. Sequences are shown in the same order in each panel. The vertical lines show the time of infection (dashed), time of treatment start (solid) and the time of sampling (dotted). The color shows the number of RNA sequences subsampled from the original alignment at each sample time. If fewer sequences were available then the number indicated by the color at a given time, all available sequences were used. Sites with greater than 75% missing gaps have been removed from the alignment.



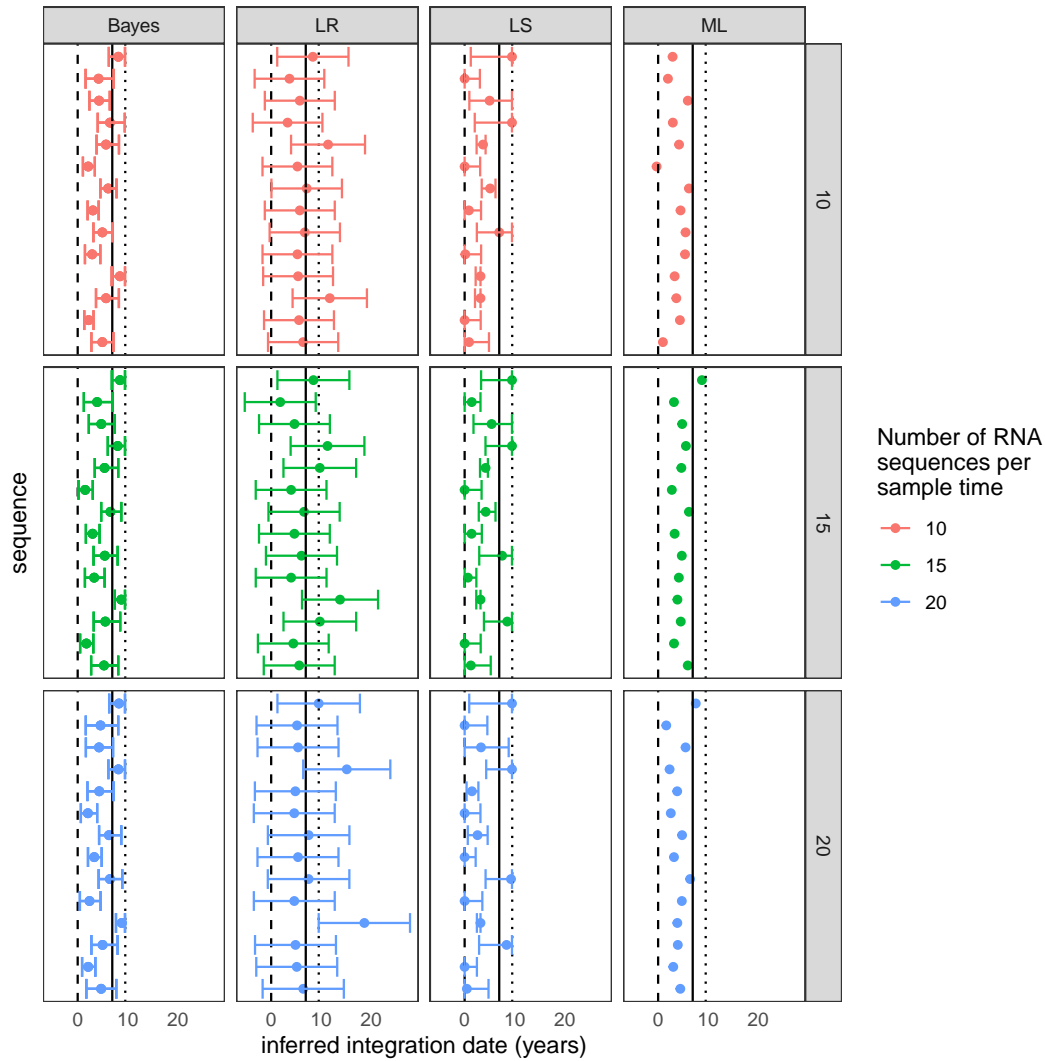

**Fig. S10.** The inferred latent integration dates for Env\_2 from patient 217 are shown for each method. 95% confidence intervals are shown for the LR and LS methods, and the 95% credible interval is shown for HIVTree. Sequences are shown in the same order in each panel. The vertical lines show the time of infection (dashed), time of treatment start (solid) and the time of sampling (dotted). The color shows the number of RNA sequences subsampled from the original alignment at each sample time. If fewer sequences were available then the number indicated by the color at a given time, all available sequences were used. Sites with greater than 95% missing gaps have been removed from the alignment.

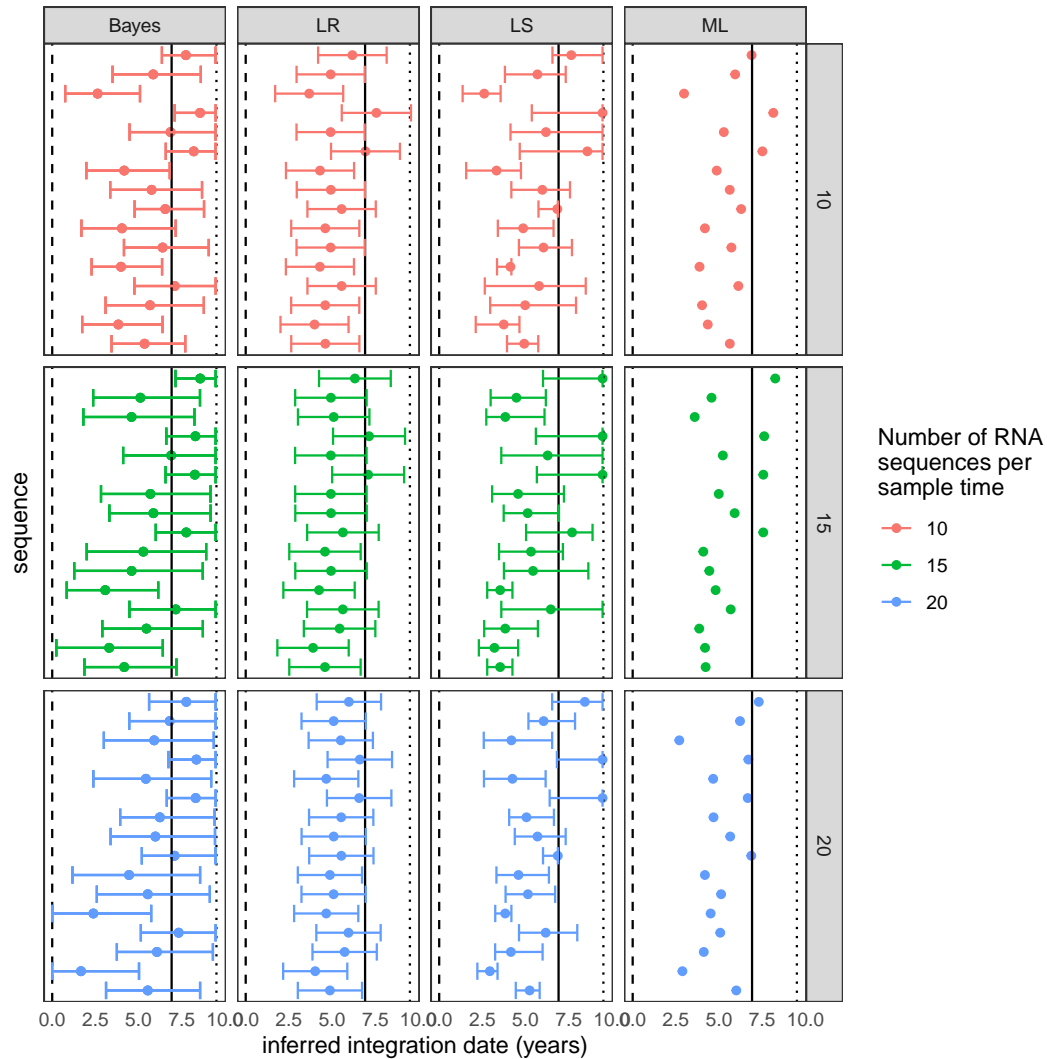

**Fig. S11.** The inferred latent integration dates for Env\_3 from patient 217 are shown for each method. 95% confidence intervals are shown for the LR and LS methods, and the 95% credible interval is shown for HIVTree. Sequences are shown in the same order in each panel. The vertical lines show the time of infection (dashed), time of treatment start (solid) and the time of sampling (dotted). The color shows the number of RNA sequences subsampled from the original alignment at each sample time. If fewer sequences were available then the number indicated by the color at a given time, all available sequences were used. Sites with greater than 75% missing gaps have been removed from the alignment.

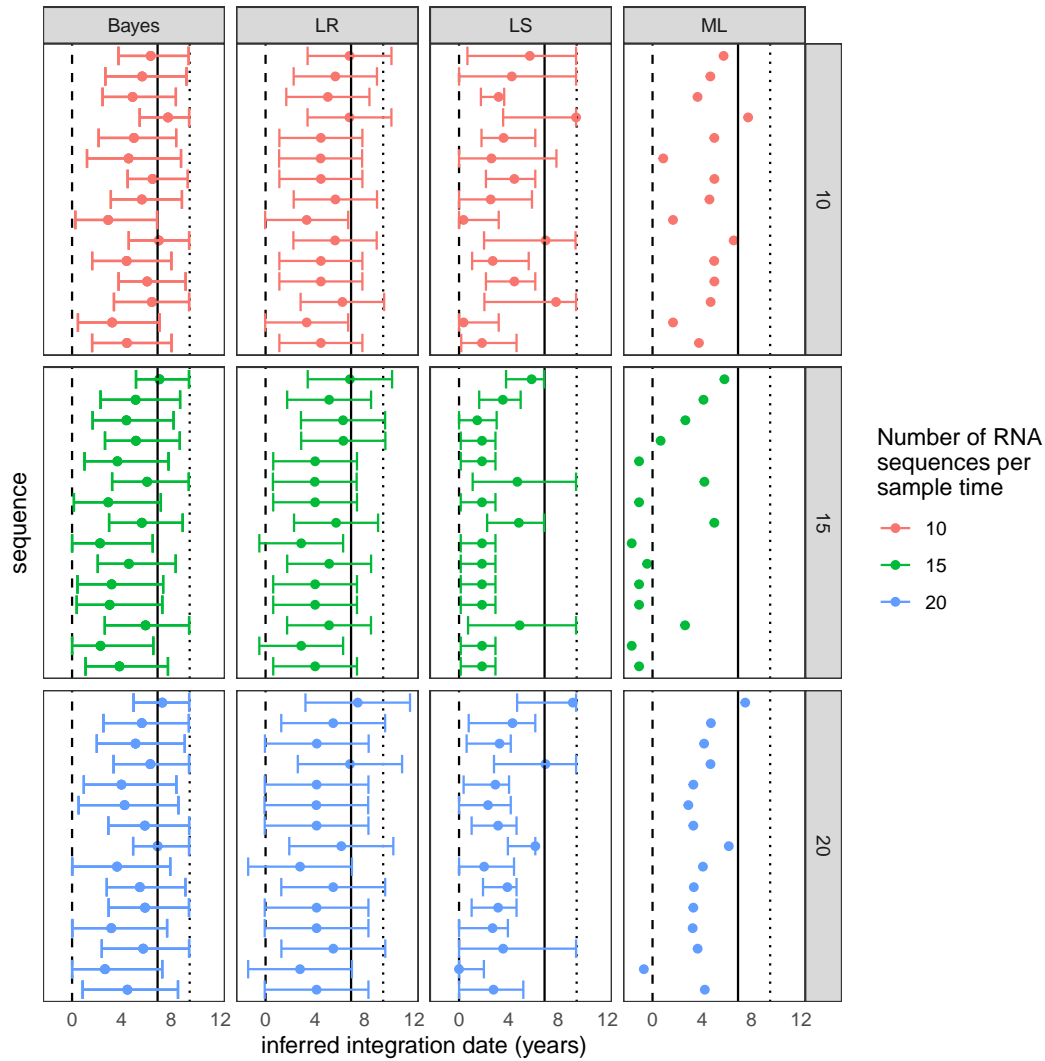

**Fig. S12.** The inferred latent integration dates for Env\_4 from patient 217 are shown for each method. 95% confidence intervals are shown for the LR and LS methods, and the 95% credible interval is shown for HIVTree. Sequences are shown in the same order in each panel. The vertical lines show the time of infection (dashed), time of treatment start (solid) and the time of sampling (dotted). The color shows the number of RNA sequences subsampled from the original alignment at each sample time. If fewer sequences were available then the number indicated by the color at a given time, all available sequences were used. Sites with greater than 75% missing gaps have been removed from the alignment.

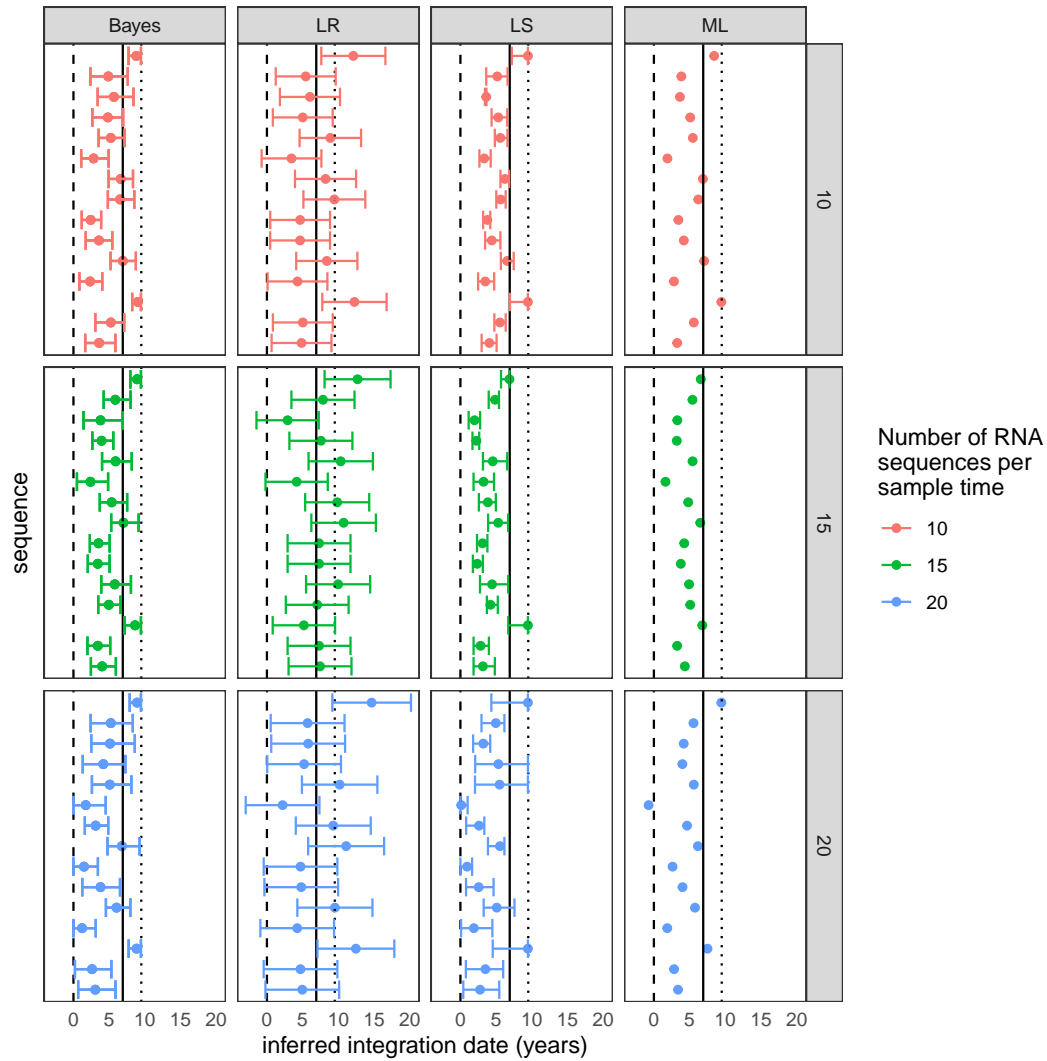

**Fig. S13.** The inferred latent integration dates for Env\_4 from patient 217 are shown for each method. 95% confidence intervals are shown for the LR and LS methods, and the 95% credible interval is shown for HIVTree. Sequences are shown in the same order in each panel. The vertical lines show the time of infection (dashed), time of treatment start (solid) and the time of sampling (dotted). The color shows the number of RNA sequences subsampled from the original alignment at each sample time. If fewer sequences were available then the number indicated by the color at a given time, all available sequences were used. Sites with greater than 95% missing gaps have been removed from the alignment.

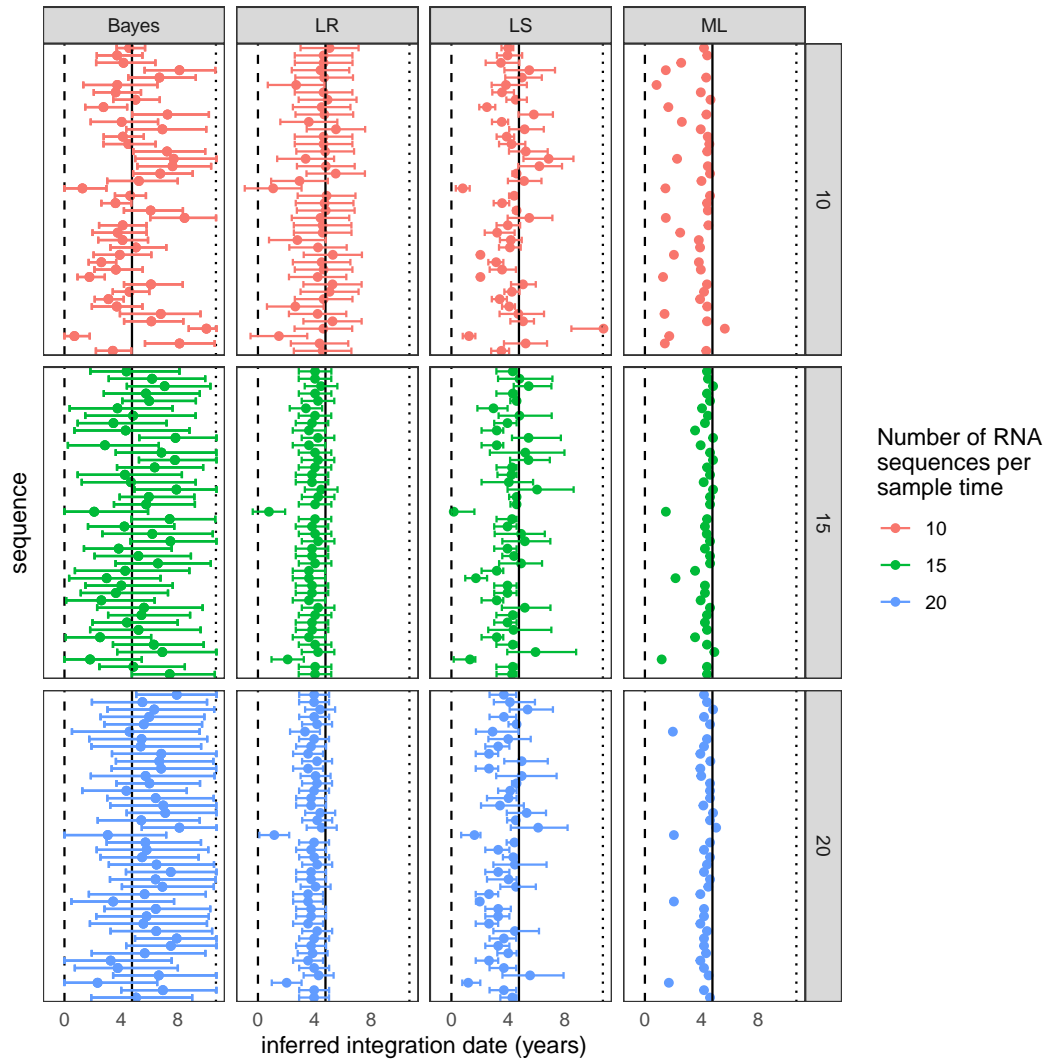

**Fig. S14.** The inferred latent integration dates for Env\_2 from patient 257 are shown for each method. 95% confidence intervals are shown for the LR and LS methods, and the 95% credible interval is shown for HIVTree. Sequences are shown in the same order in each panel. The vertical lines show the time of infection (dashed), time of treatment start (solid) and the time of sampling (dotted). The color shows the number of RNA sequences subsampled from the original alignment at each sample time. If fewer sequences were available then the number indicated by the color at a given time, all available sequences were used. Sites with greater than 75% missing gaps have been removed from the alignment.

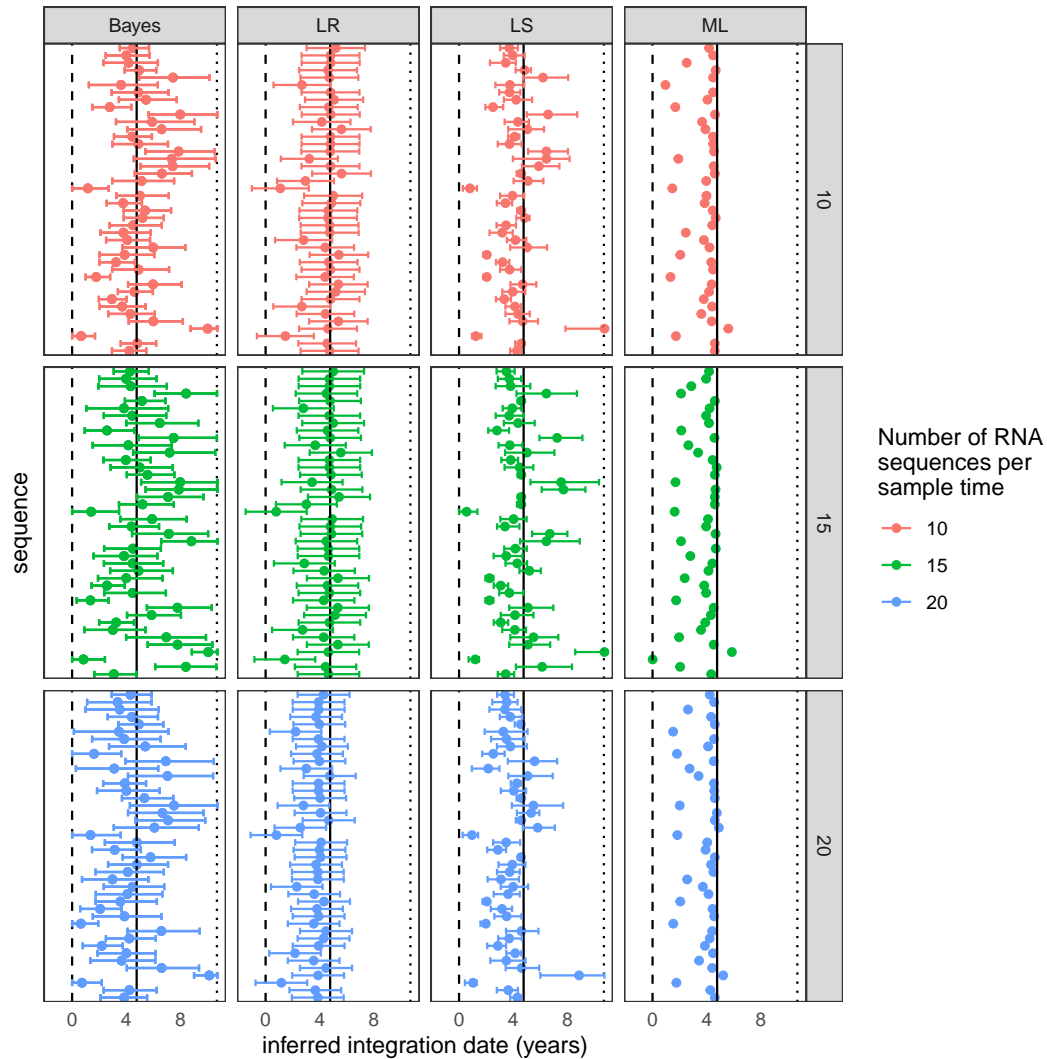

**Fig. S15.** The inferred latent integration dates for Env\_2 from patient 257 are shown for each method. 95% confidence intervals are shown for the LR and LS methods, and the 95% credible interval is shown for HIVTree. Sequences are shown in the same order in each panel. The vertical lines show the time of infection (dashed), time of treatment start (solid) and the time of sampling (dotted). The color shows the number of RNA sequences subsampled from the original alignment at each sample time. If fewer sequences were available then the number indicated by the color at a given time, all available sequences were used. Sites with greater than 85% missing gaps have been removed from the alignment.

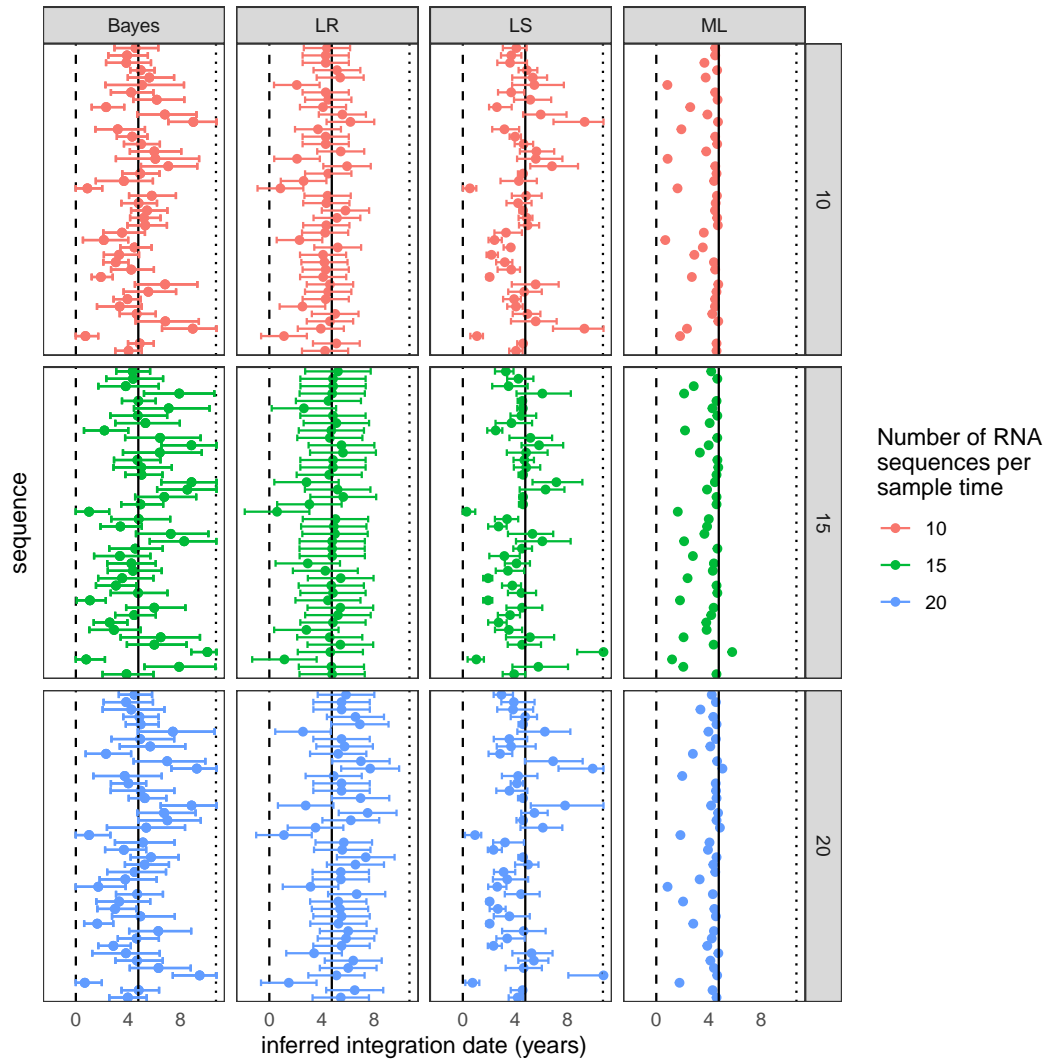

**Fig. S16.** The inferred latent integration dates for Env\_2 from patient 257 are shown for each method. 95% confidence intervals are shown for the LR and LS methods, and the 95% credible interval is shown for HIVTree. Sequences are shown in the same order in each panel. The vertical lines show the time of infection (dashed), time of treatment start (solid) and the time of sampling (dotted). The color shows the number of RNA sequences subsampled from the original alignment at each sample time. If fewer sequences were available then the number indicated by the color at a given time, all available sequences were used. Sites with greater than 95% missing gaps have been removed from the alignment.

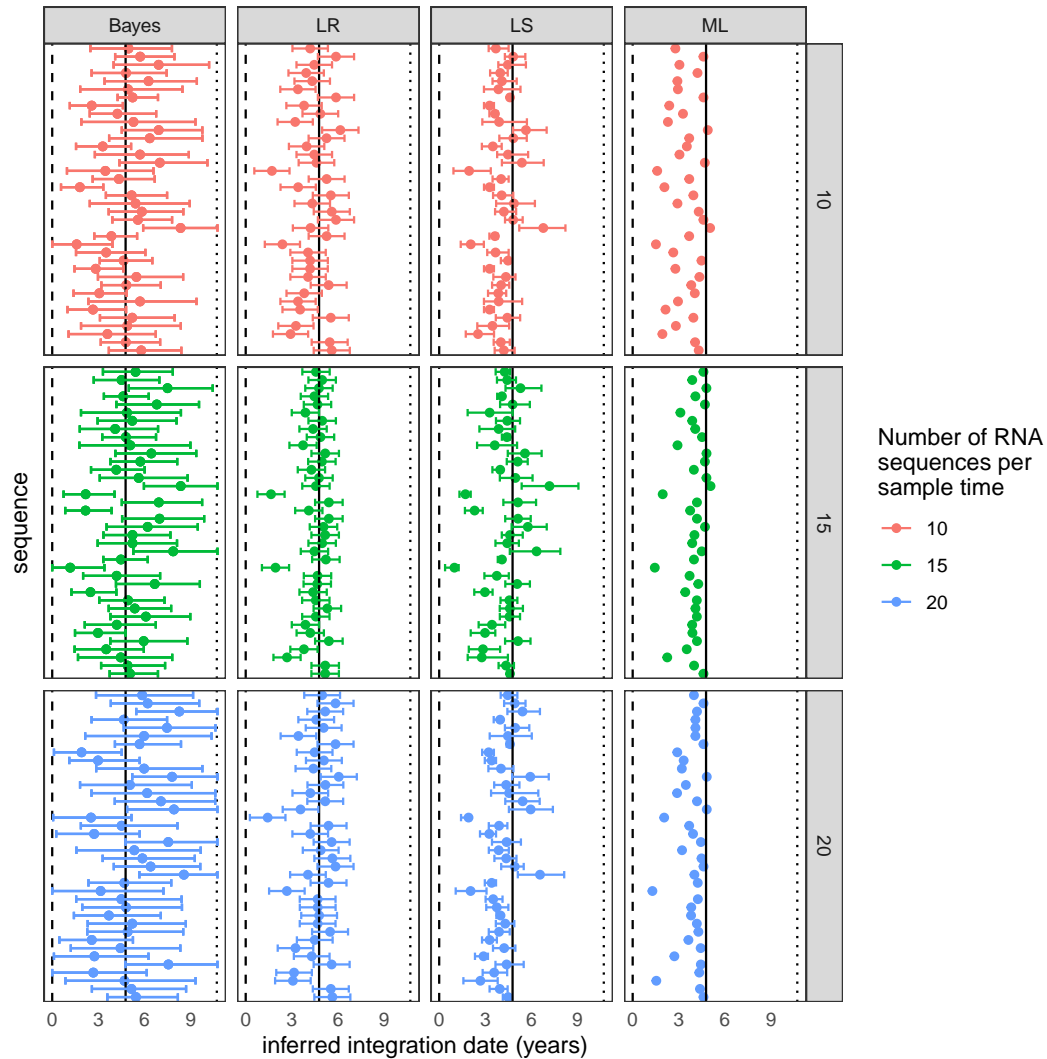

**Fig. S17.** The inferred latent integration dates for Env\_3 from patient 257 are shown for each method. 95% confidence intervals are shown for the LR and LS methods, and the 95% credible interval is shown for HIVTree. Sequences are shown in the same order in each panel. The vertical lines show the time of infection (dashed), time of treatment start (solid) and the time of sampling (dotted). The color shows the number of RNA sequences subsampled from the original alignment at each sample time. If fewer sequences were available then the number indicated by the color at a given time, all available sequences were used. Sites with greater than 75% missing gaps have been removed from the alignment.



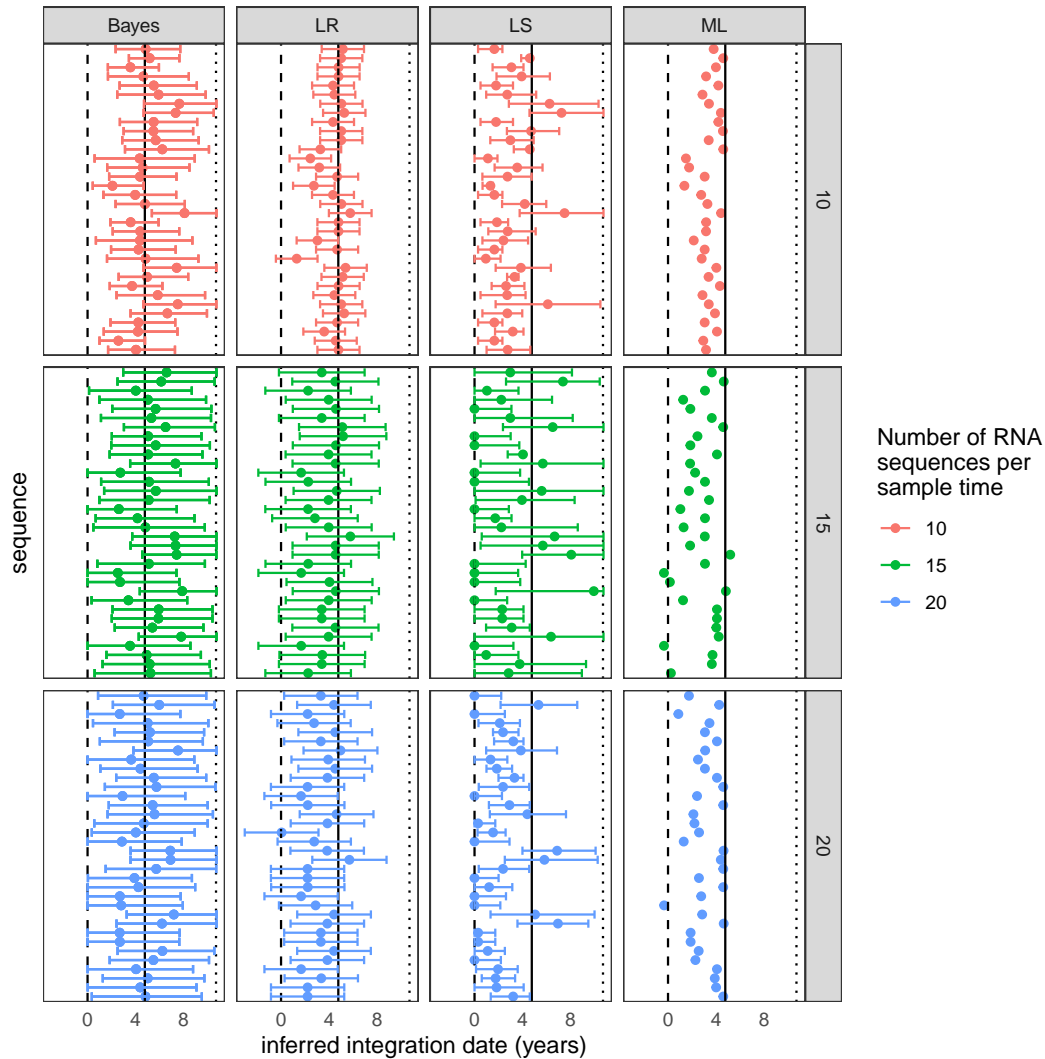

**Fig. S18.** The inferred latent integration dates for Env\_4 from patient 257 are shown for each method. 95% confidence intervals are shown for the LR and LS methods, and the 95% credible interval is shown for HIVTree. Sequences are shown in the same order in each panel. The vertical lines show the time of infection (dashed), time of treatment start (solid) and the time of sampling (dotted). The color shows the number of RNA sequences subsampled from the original alignment at each sample time. If fewer sequences were available then the number indicated by the color at a given time, all available sequences were used. Sites with greater than 75% missing gaps have been removed from the alignment.

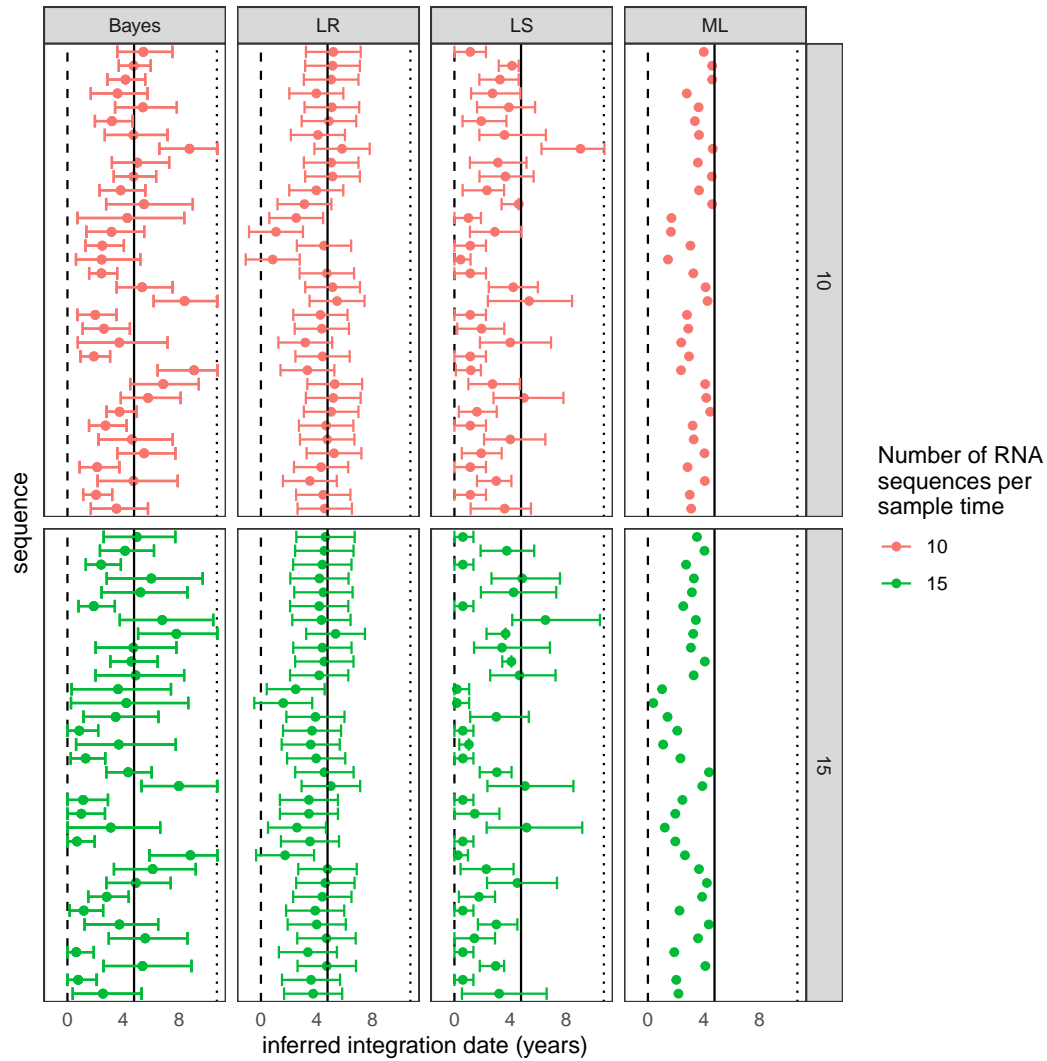

**Fig. S19.** The inferred latent integration dates for Env\_4 from patient 257 are shown for each method. 95% confidence intervals are shown for the LR and LS methods, and the 95% credible interval is shown for HIVTree. Sequences are shown in the same order in each panel. The vertical lines show the time of infection (dashed), time of treatment start (solid) and the time of sampling (dotted). The color shows the number of RNA sequences subsampled from the original alignment at each sample time. If fewer sequences were available then the number indicated by the color at a given time, all available sequences were used. Sites with greater than 85% missing gaps have been removed from the alignment.

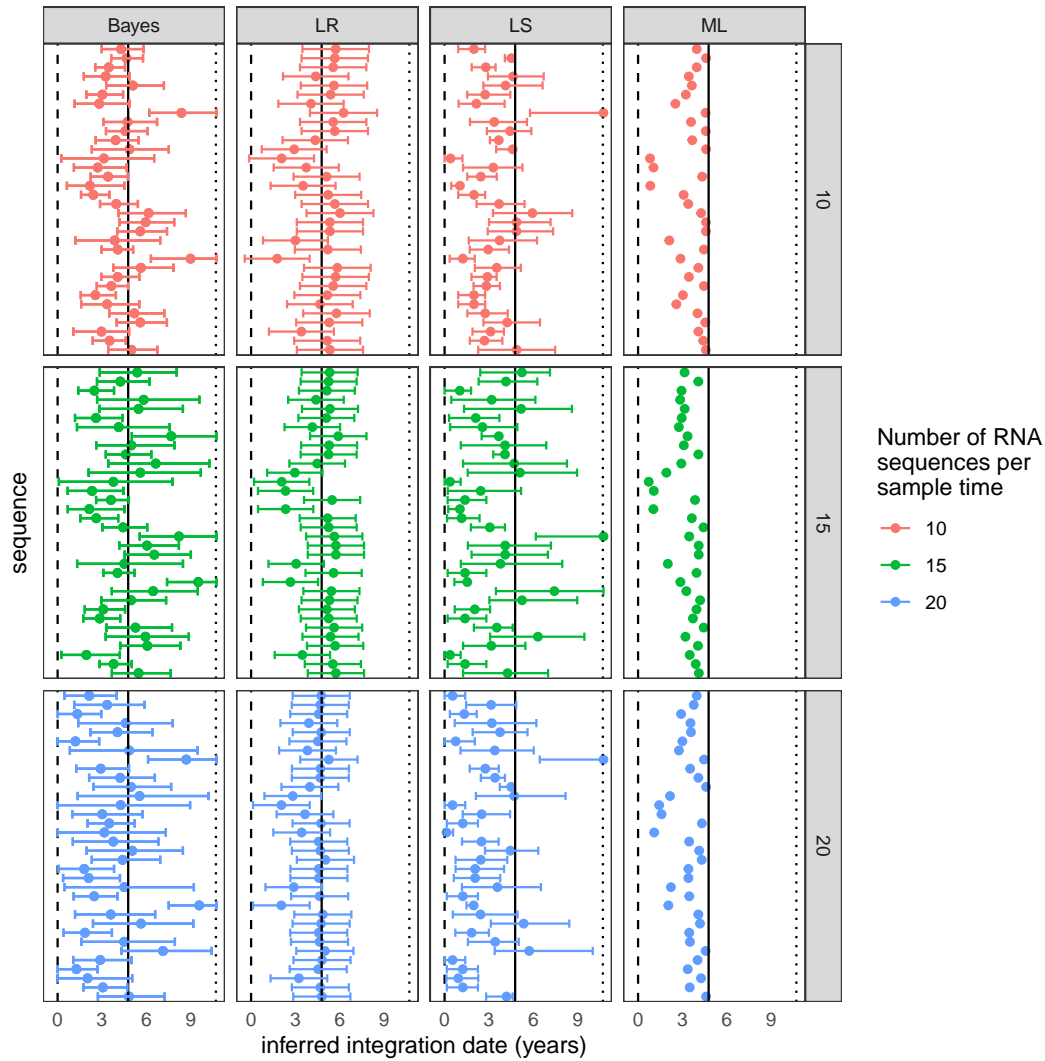

**Fig. S20.** The inferred latent integration dates for Env\_4 from patient 257 are shown for each method. 95% confidence intervals are shown for the LR and LS methods, and the 95% credible interval is shown for HIVTree. Sequences are shown in the same order in each panel. The vertical lines show the time of infection (dashed), time of treatment start (solid) and the time of sampling (dotted). The color shows the number of RNA sequences subsampled from the original alignment at each sample time. If fewer sequences were available then the number indicated by the color at a given time, all available sequences were used. Sites with greater than 95% missing gaps have been removed from the alignment.

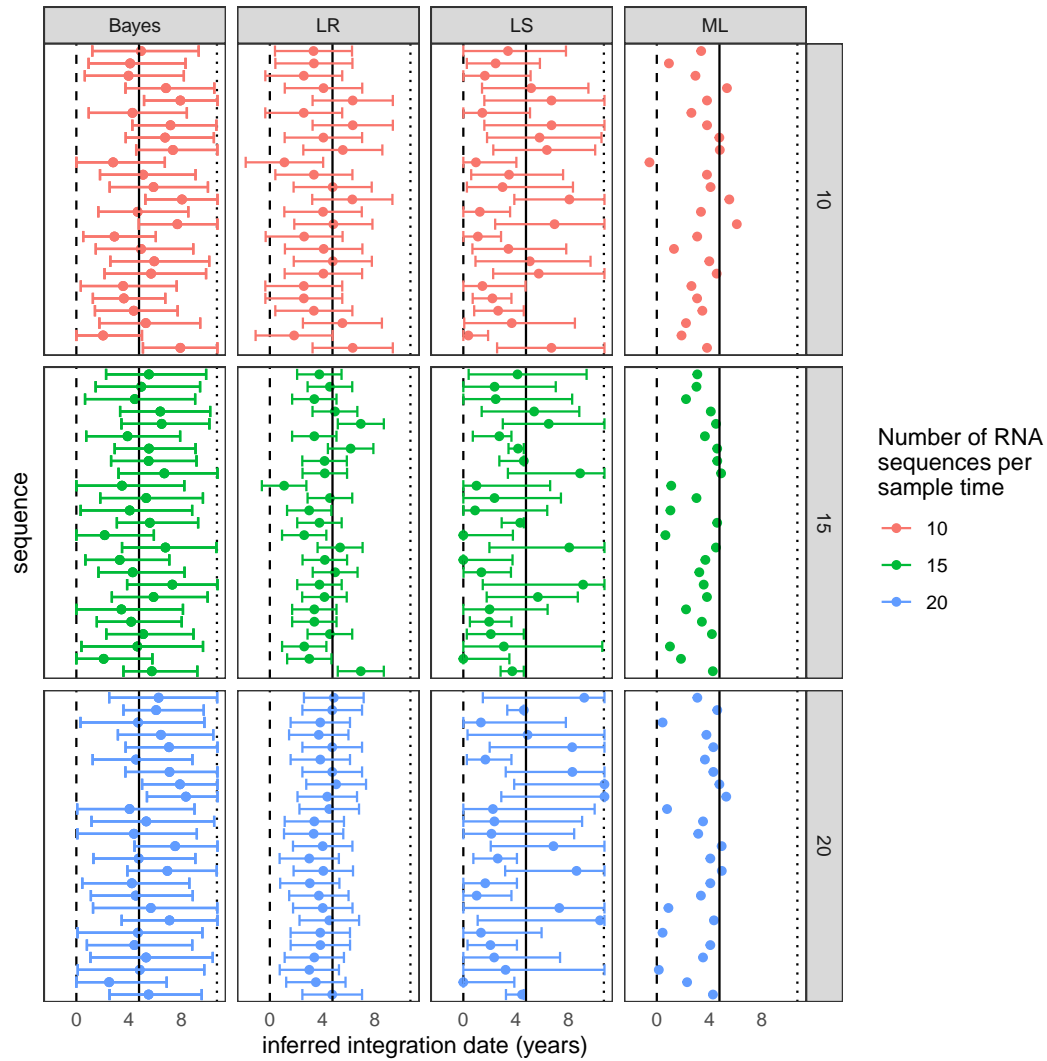

**Fig. S21.** The inferred latent integration dates for GAG\_1 from patient 257 are shown for each method. 95% confidence intervals are shown for the LR and LS methods, and the 95% credible interval is shown for HIVTree. Sequences are shown in the same order in each panel. The vertical lines show the time of infection (dashed), time of treatment start (solid) and the time of sampling (dotted). The color shows the number of RNA sequences subsampled from the original alignment at each sample time. If fewer sequences were available then the number indicated by the color at a given time, all available sequences were used. Sites with greater than 75% missing gaps have been removed from the alignment.

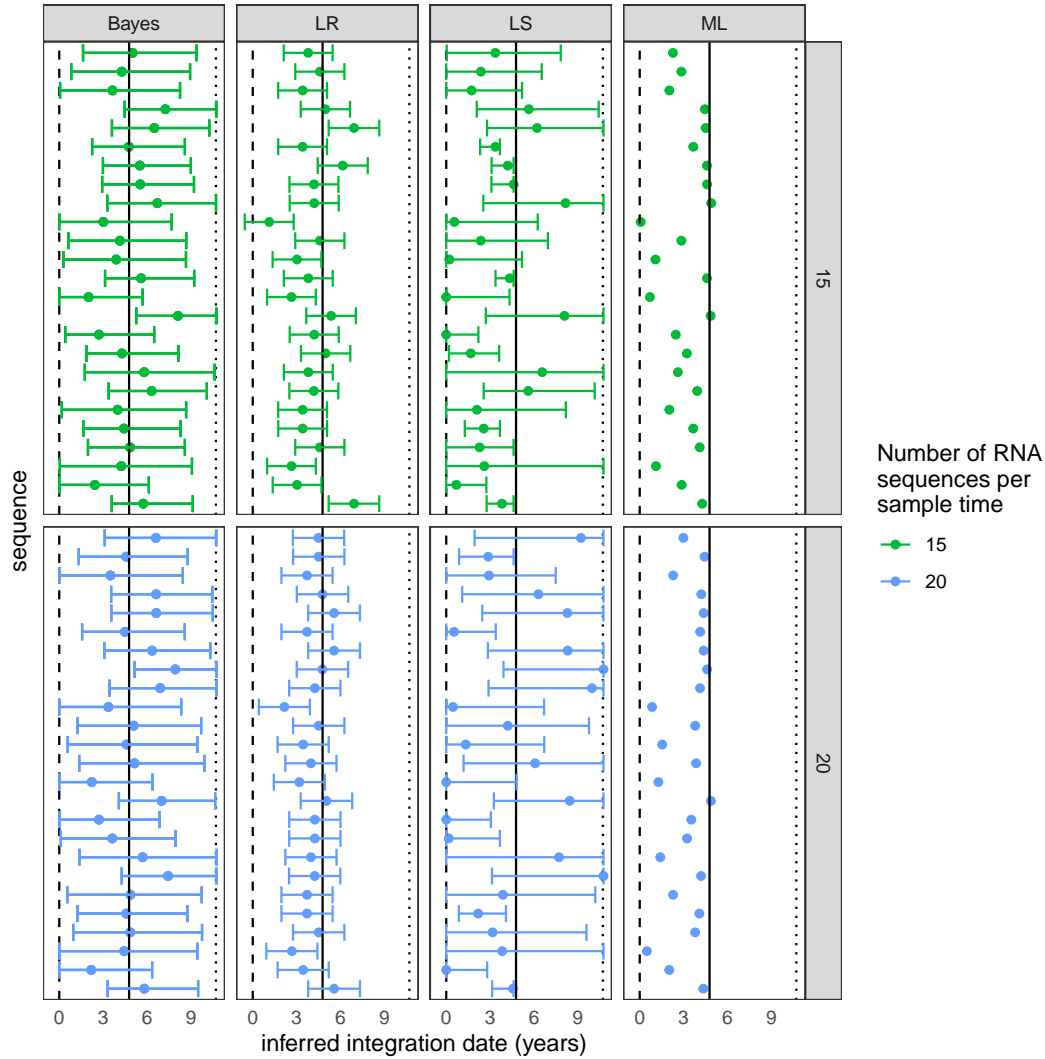

**Fig. S22.** The inferred latent integration dates for GAG\_1 from patient 257 are shown for each method. 95% confidence intervals are shown for the LR and LS methods, and the 95% credible interval is shown for HIVTree. Sequences are shown in the same order in each panel. The vertical lines show the time of infection (dashed), time of treatment start (solid) and the time of sampling (dotted). The color shows the number of RNA sequences subsampled from the original alignment at each sample time. If fewer sequences were available then the number indicated by the color at a given time, all available sequences were used. Sites with greater than 95% missing gaps have been removed from the alignment.

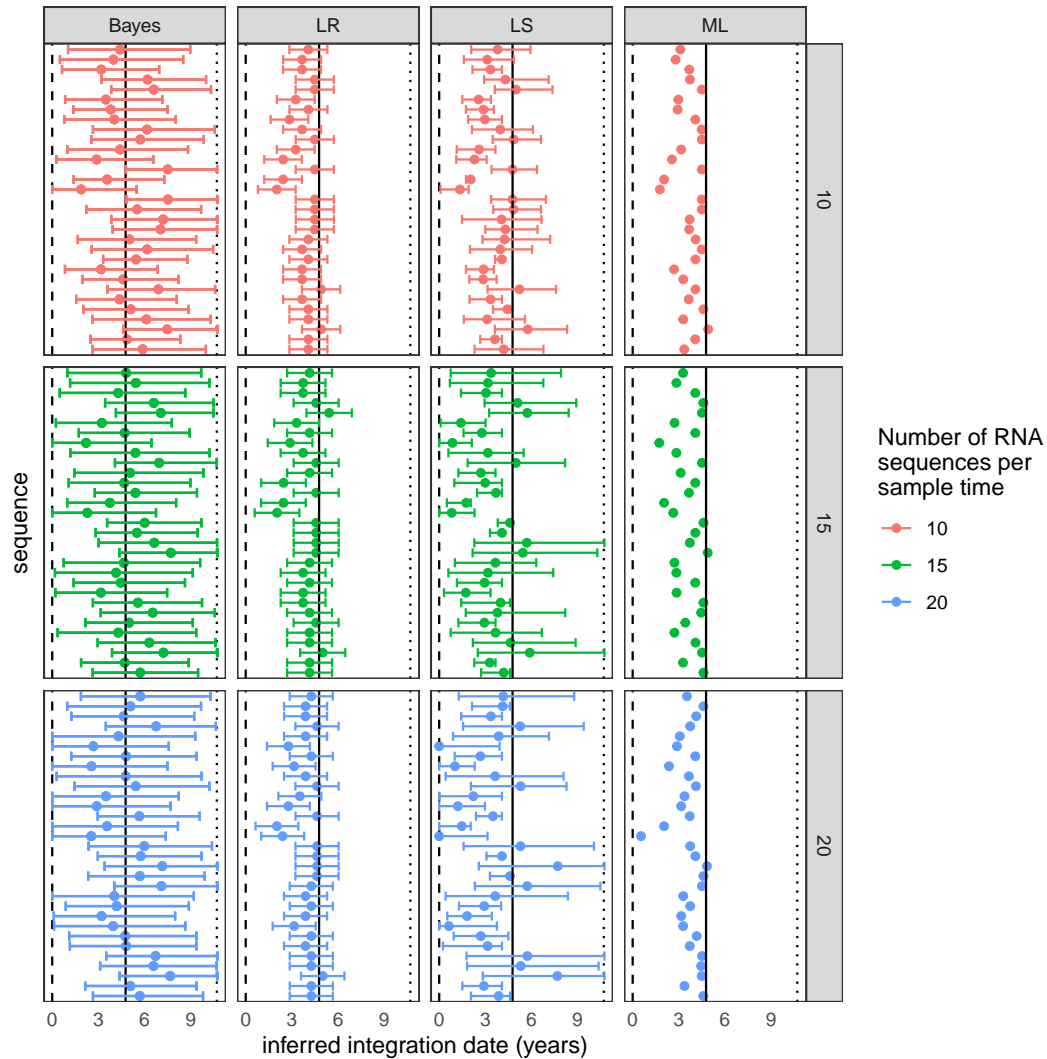

**Fig. S23.** The inferred latent integration dates for NEF\_1 from patient 257 are shown for each method. 95% confidence intervals are shown for the LR and LS methods, and the 95% credible interval is shown for HIVTree. Sequences are shown in the same order in each panel. The vertical lines show the time of infection (dashed), time of treatment start (solid) and the time of sampling (dotted). The color shows the number of RNA sequences subsampled from the original alignment at each sample time. If fewer sequences were available then the number indicated by the color at a given time, all available sequences were used. Sites with greater than 75% missing gaps have been removed from the alignment.

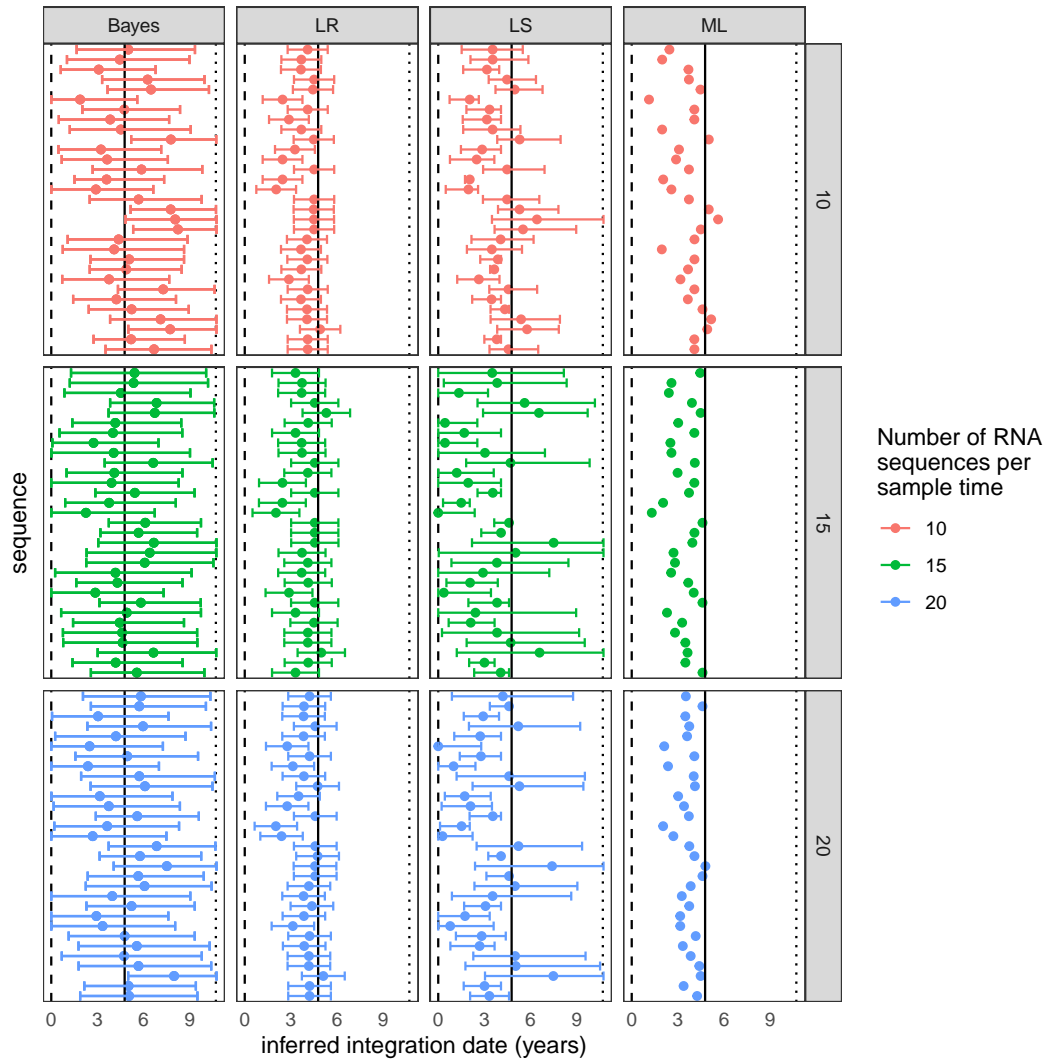

**Fig. S24.** The inferred latent integration dates for NEF\_1 from patient 257 are shown for each method. 95% confidence intervals are shown for the LR and LS methods, and the 95% credible interval is shown for HIVTree. Sequences are shown in the same order in each panel. The vertical lines show the time of infection (dashed), time of treatment start (solid) and the time of sampling (dotted). The color shows the number of RNA sequences subsampled from the original alignment at each sample time. If fewer sequences were available then the number indicated by the color at a given time, all available sequences were used. Sites with greater than 95% missing gaps have been removed from the alignment.

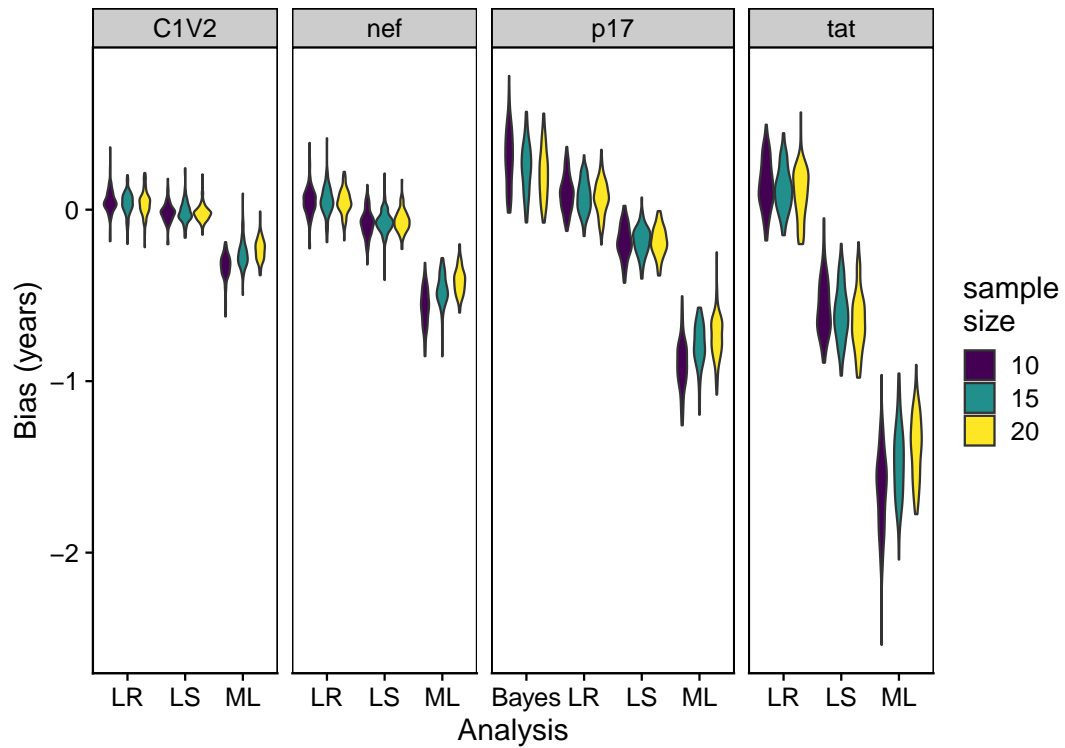

**Fig. S25.** The bias for each simulated region using each of four analysis is shown. Each data point in the violin plot is the average bias of 30 latent times in each of 30 alignments with a fixed topology. There are a total of 100 fixed topologies for each violin plot. The number of non-latent sequences sampled at each of 10 sampling time points is indicated by the color. While the longest and most quickly evolving gene, *C1V2*, has the lowest bias for all methods and the shorter, more slowly evolving genes have greater bias, there is not a consistent trend in bias by the sample size.



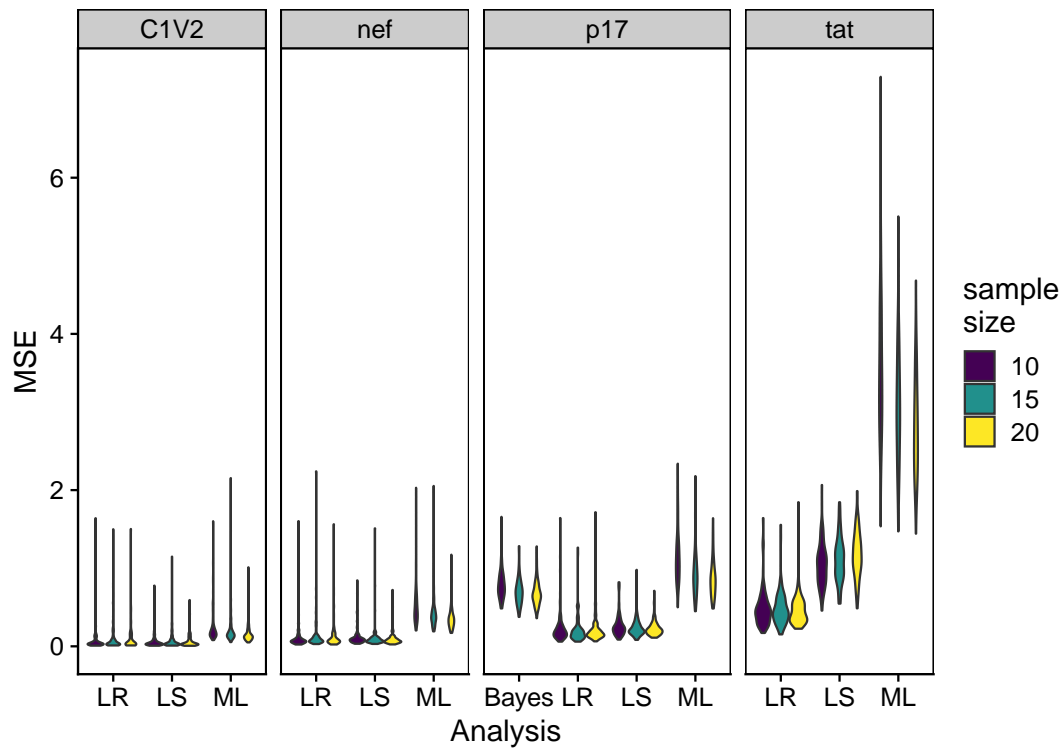

**Fig. S26.** Each data point in the violin plot is the average MSE of 30 latent times in each of 30 alignments with a fixed topology. There are a total of 100 fixed topologies for each violin plot. The number of non-latent sequences sampled at each of 10 sampling time points is indicated by the color. There is not a consistent trend in MSE by the sample size.

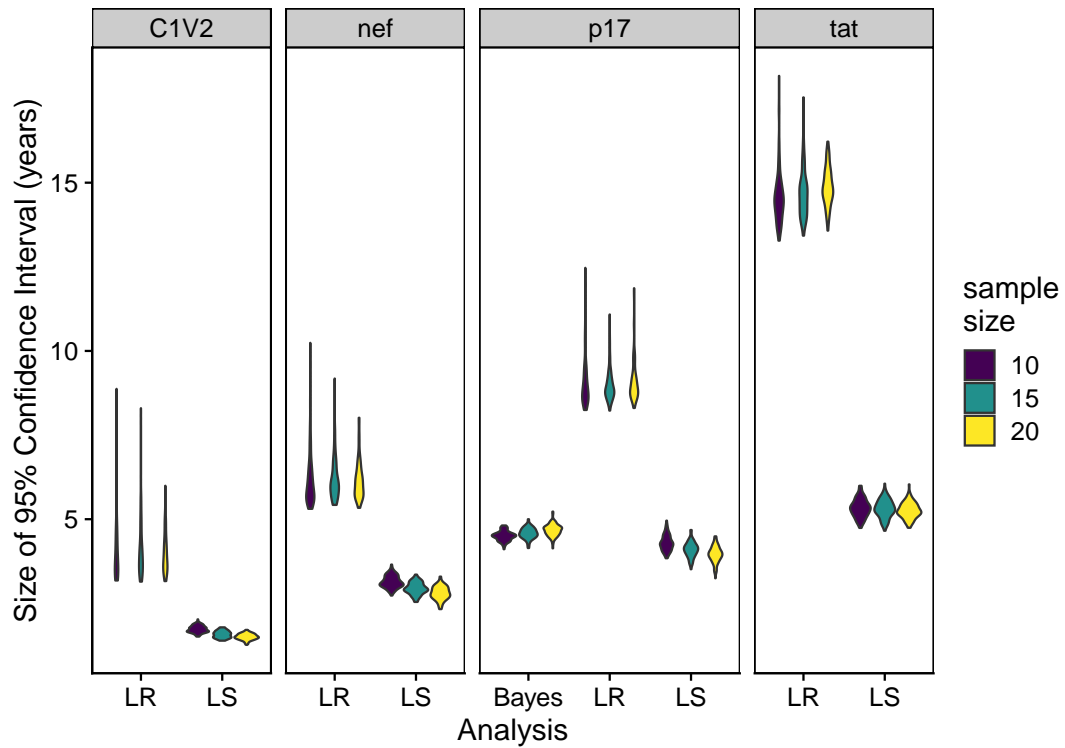

**Fig. S27.** Each data point in the violin plot is the average size of the 95% confidence intervals (or credible sets for the Bayesian method) of 30 latent times in each of 30 alignments with a fixed topology. There are a total of 100 fixed topologies for each violin plot. The number of non-latent sequences sampled at each of 10 sampling time points is indicated by the color. The longest and most quickly evolving gene, *C1V2*, has smaller confidence intervals for all methods. The sample size does not have a large effect on the size of the confidence intervals.

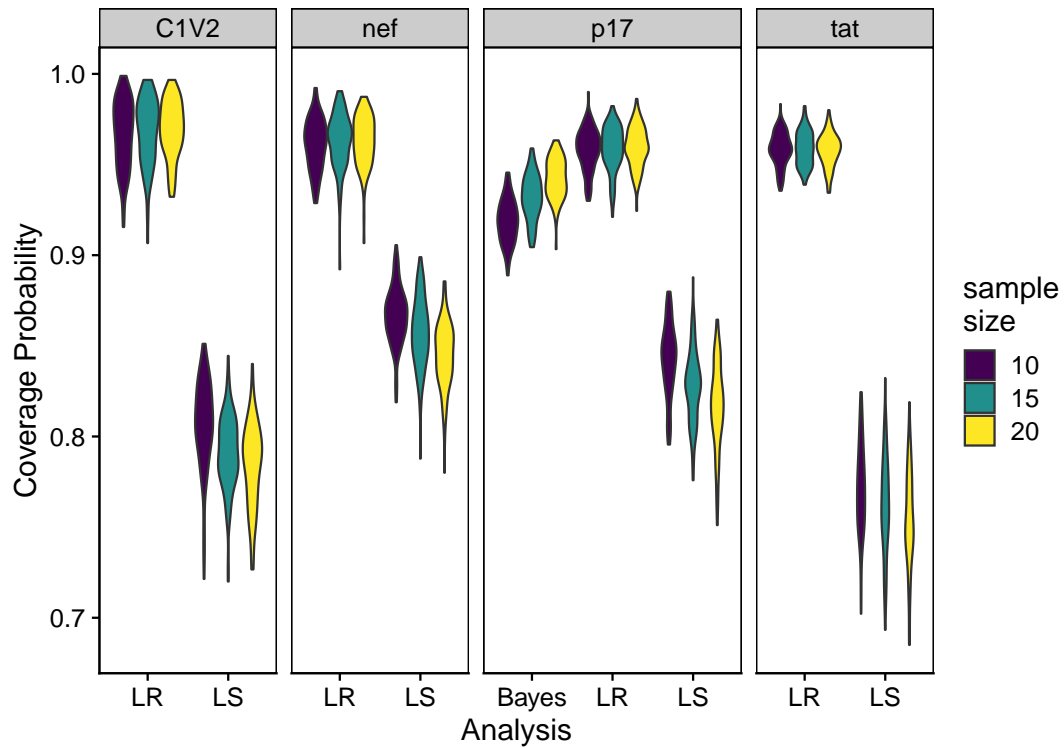

**Fig. S28.** Each data point in the violin plot is the probability the true latent time falls within the 95% confidence intervals (or 95% highest posterior density set) for 30 latent times in each of 30 alignments with a fixed topology. There are a total of 100 fixed topologies for each violin plot. The number of non-latent sequences sampled at each of 10 sampling time points is indicated by the color. This probability is always 1 for the LR method. For the LS method, the probability decreases when the region is shorter with a lower mutation rate, but does not vary predictably with sample size. The ML method is not shown since it does not provide confidence intervals or credible sets.

## 209 References

- 210 1. K Soetaert, T Petzoldt, RW Setzer, Solving differential equations in R : Package deSolve. *J. Stat. Softw.* **33** (2010).
- 211 2. MA Stafford, et al., Modeling plasma virus concentration during primary HIV infection. *J. Theor. Biol.* **203**, 285–301
- 212 (2000).
- 213 3. TW Chun, et al., Quantification of latent tissue reservoirs and total body viral load in HIV-1 infection. *Nature* **387**,
- 214 183–188 (1997).
- 215 4. Z Yang, PAML 4: Phylogenetic analysis by maximum likelihood. *Mol. Biol. Evol.* **24**, 1586–1591 (2007).
- 216 5. Y Liu, JP McNevin, S Holte, MJ McElrath, JI Mullins, Dynamics of viral evolution and CTL responses in HIV-1 infection.
- 217 *PLoS One* **6**, e15639 (2011).
- 218 6. Y Liu, et al., Evolution of human immunodeficiency virus type 1 cytotoxic T-lymphocyte epitopes: fitness-balanced escape.
- 219 *J. Virol.* **81**, 12179–12188 (2007).
- 220 7. Y Liu, et al., Selection on the human immunodeficiency virus type 1 proteome following primary infection. *J. Virol.* **80**,
- 221 9519–9529 (2006).
- 222 8. AM Kozlov, D Darriba, T Flouri, B Morel, A Stamatakis, RAxML-NG: a fast, scalable and user-friendly tool for maximum
- 223 likelihood phylogenetic inference. *Bioinformatics* **35**, 4453–4455 (2019).
- 224 9. M Hasegawa, H Kishino, T Yano, Dating of the human-ape splitting by a molecular clock of mitochondrial DNA. *J. Mol.*
- 225 *Evol.* **22**, 160–174 (1985).
- 226 10. Z Yang, Maximum-likelihood estimation of phylogeny from DNA sequences when substitution rates differ over sites. *Mol.*
- 227 *biology evolution* **10**, 1396–1401 (1993).
- 228 11. T Stadler, Z Yang, Dating phylogenies with sequentially sampled tips. *Syst. Biol.* **62**, 674–688 (2013).
- 229 12. Z Yang, B Rannala, Bayesian estimation of species divergence times under a molecular clock using multiple fossil
- 230 calibrations with soft bounds. *Mol. Biol. Evol.* **23**, 212–226 (2006).
- 231 13. BR Jones, et al., Phylogenetic approach to recover integration dates of latent HIV sequences within-host. *Proc. Natl.*
- 232 *Acad. Sci.* **115**, E8958–E8967 (2018).
- 233 14. J Rozewicki, S Li, KM Amada, DM Standley, K Katoh, MAFFT-DASH: integrated protein sequence and structural
- 234 alignment. *Nucleic Acids Res.* **47**, W5–W10 (2019).
- 235 15. MR Abrahams, et al., The replication-competent HIV-1 latent reservoir is primarily established near the time of therapy
- 236 initiation. *Sci. Transl. Medicine* **11**, eaaw5589 (2019).
- 237 16. R Luo, MJ Piovoso, J Martinez-Picado, R Zurakowski, HIV model parameter estimates from interruption trial data
- 238 including drug efficacy and reservoir dynamics. *PLoS ONE* **7**, e40198 (2012).
- 239 17. AL Hill, DIS Rosenbloom, F Fu, MA Nowak, RF Siliciano, Predicting the outcomes of treatment to eradicate the latent
- 240 reservoir for HIV-1. *Proc. Natl. Acad. Sci.* **111**, 13475–13480 (2014).
- 241 18. KM Bruner, et al., Defective proviruses rapidly accumulate during acute HIV-1 infection. *Nat. Medicine* **22**, 1043–1049
- 242 (2016).
- 243 19. MJ Peluso, et al., Differential decay of intact and defective proviral DNA in HIV-1–infected individuals on suppressive
- 244 antiretroviral therapy. *JCI Insight* **5**, e132997 (2020).
